# Supplementary material
Source: publisher figshare collection journal article supplement (https://acs.figshare.com/ndownloader/files/4291777)
Supplement: Supplementary file 1 [file 4291777]

 
data_80325ma 
 
_audit_creation_method            SHELXL-97 
_chemical_name_systematic 
; 
 ? 
; 
_chemical_name_common             ? 
_chemical_melting_point           ? 
_chemical_formula_moiety          
 'C51 H45 B N2 O4, C6 H14'  
_chemical_formula_sum 
 'C57 H59 B N2 O4' 
_chemical_formula_weight          846.87 
 
loop_ 
 _atom_type_symbol 
 _atom_type_description 
 _atom_type_scat_dispersion_real 
 _atom_type_scat_dispersion_imag 
 _atom_type_scat_source 
 'C'  'C'   0.0033   0.0016 
 'International Tables Vol C Tables 4.2.6.8 and 6.1.1.4' 
 'H'  'H'   0.0000   0.0000 
 'International Tables Vol C Tables 4.2.6.8 and 6.1.1.4' 
 'B'  'B'   0.0013   0.0007 
 'International Tables Vol C Tables 4.2.6.8 and 6.1.1.4' 
 'N'  'N'   0.0061   0.0033 
 'International Tables Vol C Tables 4.2.6.8 and 6.1.1.4' 
 'O'  'O'   0.0106   0.0060 
 'International Tables Vol C Tables 4.2.6.8 and 6.1.1.4' 
 
_symmetry_cell_setting                 monoclinic
_symmetry_space_group_name_H-M        'P 21'
_symmetry_space_group_name_Hall       'P 2yb'
_symmetry_Int_Tables_number            4
 
loop_ 
 _symmetry_equiv_pos_as_xyz 
 'x, y, z' 
 '-x, y+1/2, -z' 
 
_cell_length_a                    9.074(2) 
_cell_length_b                    21.105(5) 
_cell_length_c                    12.299(4) 
_cell_angle_alpha                 90.00 
_cell_angle_beta                  105.218(10) 
_cell_angle_gamma                 90.00 
_cell_volume                      2272.8(11) 
_cell_formula_units_Z             2 
_cell_measurement_temperature     123(2) 
_cell_measurement_reflns_used     18069 
_cell_measurement_theta_min       3.0 
_cell_measurement_theta_max       27.5
 
_exptl_crystal_description        'prism' 
_exptl_crystal_colour             'yellow'
_exptl_crystal_size_max           0.20 
_exptl_crystal_size_mid           0.20 
_exptl_crystal_size_min           0.20 
_exptl_crystal_density_meas       ? 
_exptl_crystal_density_diffrn     1.237 
_exptl_crystal_density_method     'not measured' 
_exptl_crystal_F_000              904 
_exptl_absorpt_coefficient_mu     0.076 
_exptl_absorpt_correction_type    none 
_exptl_absorpt_correction_T_min   0.9849 
_exptl_absorpt_correction_T_max   0.9849 
_exptl_absorpt_process_details    ? 
 
_exptl_special_details 
; 
 ? 
; 
 
_diffrn_ambient_temperature       123(2) 
_diffrn_radiation_wavelength      0.71075 
_diffrn_radiation_type            MoK�a 
_diffrn_radiation_source          'fine-focus sealed tube' 
_diffrn_radiation_monochromator   graphite 
_diffrn_measurement_device_type   'Rigaku RAXIS-RAPID'
_diffrn_measurement_method        �w 
_diffrn_detector_area_resol_mean  5.00
_diffrn_standards_number          ? 
_diffrn_standards_interval_count  ? 
_diffrn_standards_interval_time   ? 
_diffrn_standards_decay_%         ? 
_diffrn_reflns_number             17779 
_diffrn_reflns_av_R_equivalents   0.0475 
_diffrn_reflns_av_sigmaI/netI     0.0602 
_diffrn_reflns_limit_h_min        -10 
_diffrn_reflns_limit_h_max        9 
_diffrn_reflns_limit_k_min        -24 
_diffrn_reflns_limit_k_max        25 
_diffrn_reflns_limit_l_min        -14 
_diffrn_reflns_limit_l_max        14 
_diffrn_reflns_theta_min          3.02 
_diffrn_reflns_theta_max          24.99 
_reflns_number_total              7848 
_reflns_number_gt                 6779 
_reflns_threshold_expression      >2sigma(I) 
 
_computing_data_collection        ? 
_computing_cell_refinement        ? 
_computing_data_reduction         ? 
_computing_structure_solution     'SHELXS-97 (Sheldrick, 1990)' 
_computing_structure_refinement   'SHELXL-97 (Sheldrick, 1997)' 
_computing_molecular_graphics     ? 
_computing_publication_material   ? 
 
_refine_special_details 
; 
 Refinement of F^2^ against ALL reflections.  The weighted R-factor wR and 
 goodness of fit S are based on F^2^, conventional R-factors R are based 
 on F, with F set to zero for negative F^2^. The threshold expression of 
 F^2^ > 2sigma(F^2^) is used only for calculating R-factors(gt) etc. and is 
 not relevant to the choice of reflections for refinement.  R-factors based 
 on F^2^ are statistically about twice as large as those based on F, and R- 
 factors based on ALL data will be even larger. 
; 
 
_refine_ls_structure_factor_coef  Fsqd  
_refine_ls_matrix_type            full 
_refine_ls_weighting_scheme       calc  
_refine_ls_weighting_details 
 'calc w=1/[�s^2^(Fo^2^)+(0.0961P)^2^+5.8916P] where P=(Fo^2^+2Fc^2^)/3' 
_atom_sites_solution_primary      direct 
_atom_sites_solution_secondary    difmap 
_atom_sites_solution_hydrogens    geom 
_refine_ls_hydrogen_treatment     constr 
_refine_ls_extinction_method      none 
_refine_ls_extinction_coef        ? 
_refine_ls_abs_structure_details 
 'Flack H D (1983), Acta Cryst. A39, 876-881' 
_refine_ls_abs_structure_Flack    0(2) 
_refine_ls_number_reflns          7848 
_refine_ls_number_parameters      584 
_refine_ls_number_restraints      77 
_refine_ls_R_factor_all           0.0954 
_refine_ls_R_factor_gt            0.0838 
_refine_ls_wR_factor_ref          0.2189 
_refine_ls_wR_factor_gt           0.2117 
_refine_ls_goodness_of_fit_ref    1.067 
_refine_ls_restrained_S_all       1.074 
_refine_ls_shift/su_max           0.001 
_refine_ls_shift/su_mean          0.000 
 
loop_ 
 _atom_site_label 
 _atom_site_type_symbol 
 _atom_site_fract_x 
 _atom_site_fract_y 
 _atom_site_fract_z 
 _atom_site_U_iso_or_equiv 
 _atom_site_adp_type 
 _atom_site_occupancy 
 _atom_site_symmetry_multiplicity 
 _atom_site_calc_flag 
 _atom_site_refinement_flags 
 _atom_site_disorder_assembly 
 _atom_site_disorder_group 
C1 C -0.0522(6) 0.1224(3) 0.2596(5) 0.0214(11) Uani 1 1 d . . . 
C2 C 0.0154(6) 0.0644(2) 0.2471(4) 0.0196(11) Uani 1 1 d . . . 
C3 C 0.1425(6) 0.0408(2) 0.3312(4) 0.0195(11) Uani 1 1 d . . . 
C4 C 0.2018(6) 0.0781(3) 0.4235(4) 0.0246(12) Uani 1 1 d . . . 
H1 H 0.2863 0.0627 0.4805 0.029 Uiso 1 1 calc R . . 
C5 C 0.1428(6) 0.1379(3) 0.4372(4) 0.0228(11) Uani 1 1 d . . . 
C6 C 0.2097(6) 0.1775(3) 0.5314(5) 0.0272(13) Uani 1 1 d . . . 
H2 H 0.2970 0.1629 0.5867 0.033 Uiso 1 1 calc R . . 
C7 C 0.1526(7) 0.2348(3) 0.5440(5) 0.0297(13) Uani 1 1 d . . . 
H3 H 0.1998 0.2600 0.6077 0.036 Uiso 1 1 calc R . . 
C8 C 0.0233(6) 0.2583(3) 0.4638(5) 0.0257(12) Uani 1 1 d . . . 
H4 H -0.0161 0.2990 0.4733 0.031 Uiso 1 1 calc R . . 
C9 C -0.0461(6) 0.2215(3) 0.3709(4) 0.0238(12) Uani 1 1 d . . . 
H5 H -0.1337 0.2372 0.3173 0.029 Uiso 1 1 calc R . . 
C10 C 0.0118(5) 0.1607(2) 0.3548(4) 0.0190(11) Uani 1 1 d . . . 
C11 C 0.2072(6) -0.0233(3) 0.3187(4) 0.0242(12) Uani 1 1 d . . . 
C12 C 0.3660(6) -0.0309(3) 0.3419(4) 0.0256(12) Uani 1 1 d . . . 
H6 H 0.4326 0.0042 0.3649 0.031 Uiso 1 1 calc R . . 
C13 C 0.4241(7) -0.0911(3) 0.3304(5) 0.0320(14) Uani 1 1 d . . . 
H7 H 0.5315 -0.0967 0.3466 0.038 Uiso 1 1 calc R . . 
C14 C 0.3314(7) -0.1419(3) 0.2969(5) 0.0339(14) Uani 1 1 d . . . 
H8 H 0.3737 -0.1826 0.2915 0.041 Uiso 1 1 calc R . . 
C15 C 0.1730(8) -0.1336(3) 0.2705(6) 0.0375(15) Uani 1 1 d . . . 
H9 H 0.1069 -0.1684 0.2443 0.045 Uiso 1 1 calc R . . 
C16 C 0.1136(6) -0.0754(3) 0.2824(5) 0.0265(12) Uani 1 1 d . . . 
H10 H 0.0059 -0.0704 0.2655 0.032 Uiso 1 1 calc R . . 
C17 C -0.1847(6) 0.1428(2) 0.1664(4) 0.0173(10) Uani 1 1 d . . . 
C18 C -0.1662(5) 0.1449(2) 0.0578(4) 0.0171(10) Uani 1 1 d . . . 
C19 C -0.2860(6) 0.1640(2) -0.0368(4) 0.0185(11) Uani 1 1 d . . . 
C20 C -0.4259(6) 0.1767(2) -0.0189(5) 0.0224(11) Uani 1 1 d . . . 
H11 H -0.5058 0.1906 -0.0808 0.027 Uiso 1 1 calc R . . 
C21 C -0.4564(6) 0.1701(2) 0.0860(4) 0.0203(11) Uani 1 1 d . . . 
C22 C -0.6047(6) 0.1761(2) 0.1013(5) 0.0250(12) Uani 1 1 d . . . 
H12 H -0.6863 0.1885 0.0393 0.030 Uiso 1 1 calc R . . 
C23 C -0.6337(6) 0.1644(3) 0.2028(5) 0.0268(12) Uani 1 1 d . . . 
H13 H -0.7355 0.1669 0.2095 0.032 Uiso 1 1 calc R . . 
C24 C -0.5149(6) 0.1487(3) 0.2971(5) 0.0253(12) Uani 1 1 d . . . 
H14 H -0.5356 0.1415 0.3680 0.030 Uiso 1 1 calc R . . 
C25 C -0.3680(6) 0.1436(3) 0.2866(4) 0.0215(11) Uani 1 1 d . . . 
H15 H -0.2881 0.1334 0.3514 0.026 Uiso 1 1 calc R . . 
C26 C -0.3322(6) 0.1531(2) 0.1826(4) 0.0199(11) Uani 1 1 d . . . 
C27 C -0.2628(6) 0.1678(2) -0.1525(4) 0.0222(11) Uani 1 1 d . . . 
C28 C -0.1302(7) 0.1932(3) -0.1714(5) 0.0289(13) Uani 1 1 d . . . 
H16 H -0.0516 0.2081 -0.1094 0.035 Uiso 1 1 calc R . . 
C29 C -0.1112(7) 0.1971(3) -0.2788(5) 0.0316(13) Uani 1 1 d . . . 
H17 H -0.0208 0.2153 -0.2904 0.038 Uiso 1 1 calc R . . 
C30 C -0.2225(8) 0.1747(3) -0.3695(5) 0.0391(15) Uani 1 1 d . . . 
H18 H -0.2080 0.1762 -0.4432 0.047 Uiso 1 1 calc R . . 
C31 C -0.3524(8) 0.1507(4) -0.3525(5) 0.0482(18) Uani 1 1 d . . . 
H19 H -0.4308 0.1373 -0.4158 0.058 Uiso 1 1 calc R . . 
C32 C -0.3756(7) 0.1448(3) -0.2450(5) 0.0363(14) Uani 1 1 d . . . 
H20 H -0.4658 0.1257 -0.2348 0.044 Uiso 1 1 calc R . . 
C33 C 0.5838(6) -0.0108(3) 0.1056(4) 0.0224(11) Uani 1 1 d . . . 
H21 H 0.6769 0.0118 0.1322 0.027 Uiso 1 1 calc R . . 
C34 C 0.5698(6) -0.0748(2) 0.0778(4) 0.0205(11) Uani 1 1 d . . . 
C35 C 0.4136(6) -0.0890(3) 0.0418(4) 0.0197(11) Uani 1 1 d . . . 
C36 C 0.3361(6) -0.0334(2) 0.0480(4) 0.0174(10) Uani 1 1 d . . . 
C37 C 0.1763(6) -0.0162(2) 0.0181(4) 0.0173(10) Uani 1 1 d . . . 
C38 C 0.0579(6) -0.0542(3) -0.0433(4) 0.0200(11) Uani 1 1 d . . . 
H45 H 0.0777 -0.0969 -0.0598 0.024 Uiso 1 1 calc R . . 
C39 C -0.0872(6) -0.0303(2) -0.0798(4) 0.0190(11) Uani 1 1 d . . . 
C40 C -0.2109(6) -0.0612(2) -0.1594(4) 0.0207(11) Uani 1 1 d . . . 
C41 C -0.2288(6) -0.1187(3) -0.2173(4) 0.0217(11) Uani 1 1 d . . . 
C42 C -0.3814(6) -0.1207(3) -0.2850(4) 0.0241(12) Uani 1 1 d . . . 
C43 C -0.4496(7) -0.0659(3) -0.2661(5) 0.0309(13) Uani 1 1 d . . . 
H22 H -0.5525 -0.0547 -0.3014 0.037 Uiso 1 1 calc R . . 
C44 C 0.7003(6) -0.1207(3) 0.0873(5) 0.0268(12) Uani 1 1 d . . . 
H23 H 0.7935 -0.0965 0.0869 0.032 Uiso 1 1 calc R . . 
H24 H 0.6764 -0.1486 0.0202 0.032 Uiso 1 1 calc R . . 
C45 C 0.7334(7) -0.1620(3) 0.1931(5) 0.0361(14) Uani 1 1 d . . . 
H25 H 0.7737 -0.1355 0.2597 0.054 Uiso 1 1 calc R . . 
H26 H 0.8089 -0.1944 0.1885 0.054 Uiso 1 1 calc R . . 
H27 H 0.6389 -0.1825 0.1989 0.054 Uiso 1 1 calc R . . 
C46 C 0.3489(6) -0.1541(2) 0.0067(4) 0.0211(11) Uani 1 1 d . . . 
H28 H 0.2489 -0.1583 0.0242 0.025 Uiso 1 1 calc R . . 
H29 H 0.4183 -0.1865 0.0510 0.025 Uiso 1 1 calc R . . 
C47 C 0.3281(7) -0.1668(3) -0.1183(5) 0.0296(13) Uani 1 1 d . . . 
H30 H 0.2552 -0.1363 -0.1626 0.044 Uiso 1 1 calc R . . 
H31 H 0.2892 -0.2099 -0.1363 0.044 Uiso 1 1 calc R . . 
H32 H 0.4266 -0.1624 -0.1363 0.044 Uiso 1 1 calc R . . 
C48 C -0.1110(6) -0.1700(3) -0.2111(5) 0.0284(13) Uani 1 1 d . . . 
H33 H -0.0137 -0.1504 -0.2158 0.034 Uiso 1 1 calc R . . 
H34 H -0.1457 -0.1987 -0.2765 0.034 Uiso 1 1 calc R . . 
C49 C -0.0826(7) -0.2090(3) -0.1019(6) 0.0366(15) Uani 1 1 d . . . 
H35 H -0.0447 -0.1811 -0.0368 0.055 Uiso 1 1 calc R . . 
H36 H -0.0067 -0.2420 -0.1022 0.055 Uiso 1 1 calc R . . 
H37 H -0.1784 -0.2288 -0.0970 0.055 Uiso 1 1 calc R . . 
C50 C -0.4541(7) -0.1737(3) -0.3638(5) 0.0345(14) Uani 1 1 d . . . 
H38 H -0.4059 -0.1751 -0.4273 0.041 Uiso 1 1 calc R . . 
H39 H -0.4315 -0.2144 -0.3227 0.041 Uiso 1 1 calc R . . 
C51 C -0.6227(7) -0.1682(4) -0.4106(6) 0.0457(18) Uani 1 1 d . . . 
H40 H -0.6723 -0.1691 -0.3488 0.069 Uiso 1 1 calc R . . 
H41 H -0.6598 -0.2037 -0.4618 0.069 Uiso 1 1 calc R . . 
H42 H -0.6467 -0.1282 -0.4519 0.069 Uiso 1 1 calc R . . 
O1 O -0.0428(4) 0.03047(16) 0.1513(3) 0.0181(7) Uani 1 1 d . . . 
O2 O -0.0299(4) 0.12437(16) 0.0405(3) 0.0185(8) Uani 1 1 d . . . 
B1 B -0.0113(6) 0.0569(3) 0.0514(5) 0.0187(12) Uani 1 1 d . . . 
O3 O 0.1475(4) 0.04213(16) 0.0483(3) 0.0199(8) Uani 1 1 d . . . 
O4 O -0.1221(4) 0.02540(16) -0.0462(3) 0.0194(8) Uani 1 1 d . . . 
N1 N 0.4438(5) 0.0134(2) 0.0885(4) 0.0198(9) Uani 1 1 d . . . 
H43 H 0.4229 0.0530 0.1011 0.024 Uiso 1 1 calc R . . 
N2 N -0.3514(5) -0.0300(2) -0.1905(4) 0.0303(11) Uani 1 1 d . . . 
H44 H -0.3720 0.0070 -0.1650 0.036 Uiso 1 1 calc R . . 
C1A C 0.2389(8) 0.0922(3) -0.1862(5) 0.0428(12) Uani 1 1 d DU . . 
H46 H 0.2396 0.1292 -0.2342 0.064 Uiso 1 1 calc R . . 
H47 H 0.3392 0.0876 -0.1323 0.064 Uiso 1 1 calc R . . 
H48 H 0.1607 0.0978 -0.1452 0.064 Uiso 1 1 calc R . . 
C2A C 0.2038(8) 0.0336(4) -0.2584(6) 0.0539(10) Uani 1 1 d DU . . 
H49 H 0.2745 0.0330 -0.3075 0.065 Uiso 1 1 calc R . . 
H50 H 0.2297 -0.0035 -0.2076 0.065 Uiso 1 1 calc R . . 
C3A C 0.0470(9) 0.0233(4) -0.3317(6) 0.0560(10) Uani 1 1 d DU . . 
H51 H 0.0191 0.0597 -0.3837 0.067 Uiso 1 1 calc R . . 
H52 H -0.0253 0.0224 -0.2839 0.067 Uiso 1 1 calc R . . 
C4A C 0.0282(9) -0.0369(4) -0.4002(6) 0.0575(10) Uani 1 1 d DU . . 
H53 H 0.0609 -0.0730 -0.3481 0.069 Uiso 1 1 calc R . . 
H54 H 0.0979 -0.0350 -0.4500 0.069 Uiso 1 1 calc R . . 
C5A C -0.1384(9) -0.0507(4) -0.4754(7) 0.0586(10) Uani 1 1 d DU . . 
H55 H -0.1375 -0.0905 -0.5178 0.070 Uiso 1 1 calc R . . 
H56 H -0.2072 -0.0570 -0.4257 0.070 Uiso 1 1 calc R . . 
C6A C -0.1993(9) 0.0008(4) -0.5558(7) 0.0575(13) Uani 1 1 d DU . . 
H57 H -0.2373 0.0351 -0.5167 0.086 Uiso 1 1 calc R . . 
H58 H -0.2830 -0.0155 -0.6169 0.086 Uiso 1 1 calc R . . 
H59 H -0.1179 0.0171 -0.5871 0.086 Uiso 1 1 calc R . . 
 
loop_ 
 _atom_site_aniso_label 
 _atom_site_aniso_U_11 
 _atom_site_aniso_U_22 
 _atom_site_aniso_U_33 
 _atom_site_aniso_U_23 
 _atom_site_aniso_U_13 
 _atom_site_aniso_U_12 
C1 0.018(2) 0.024(3) 0.024(3) 0.000(2) 0.009(2) 0.002(2) 
C2 0.021(3) 0.020(3) 0.019(3) 0.004(2) 0.007(2) -0.001(2) 
C3 0.017(2) 0.022(3) 0.020(3) 0.008(2) 0.006(2) -0.001(2) 
C4 0.022(3) 0.032(3) 0.020(3) 0.003(2) 0.007(2) 0.000(2) 
C5 0.017(2) 0.031(3) 0.021(3) 0.003(2) 0.005(2) 0.000(2) 
C6 0.018(3) 0.038(3) 0.023(3) -0.002(2) 0.001(2) -0.001(2) 
C7 0.034(3) 0.037(3) 0.019(3) -0.014(2) 0.009(2) -0.014(3) 
C8 0.026(3) 0.026(3) 0.027(3) -0.006(2) 0.008(2) -0.004(2) 
C9 0.027(3) 0.027(3) 0.018(3) -0.002(2) 0.008(2) -0.002(2) 
C10 0.017(2) 0.024(3) 0.017(3) 0.004(2) 0.006(2) -0.002(2) 
C11 0.030(3) 0.028(3) 0.016(3) 0.002(2) 0.007(2) 0.003(2) 
C12 0.022(3) 0.032(3) 0.023(3) 0.007(2) 0.004(2) 0.003(2) 
C13 0.027(3) 0.029(3) 0.043(4) 0.014(3) 0.014(3) 0.015(3) 
C14 0.041(4) 0.033(3) 0.027(3) 0.011(3) 0.008(3) 0.012(3) 
C15 0.046(4) 0.023(3) 0.041(4) 0.008(3) 0.008(3) 0.008(3) 
C16 0.022(3) 0.028(3) 0.026(3) 0.003(2) -0.001(2) -0.001(2) 
C17 0.024(3) 0.009(2) 0.018(3) -0.0048(19) 0.005(2) -0.001(2) 
C18 0.016(2) 0.015(2) 0.019(3) -0.003(2) 0.0029(19) -0.003(2) 
C19 0.022(3) 0.013(2) 0.019(3) -0.002(2) 0.004(2) -0.001(2) 
C20 0.020(3) 0.019(3) 0.027(3) 0.005(2) 0.003(2) 0.009(2) 
C21 0.021(3) 0.017(2) 0.023(3) -0.011(2) 0.006(2) -0.003(2) 
C22 0.024(3) 0.018(3) 0.032(3) -0.005(2) 0.006(2) 0.005(2) 
C23 0.021(3) 0.027(3) 0.034(3) -0.007(2) 0.011(2) 0.004(2) 
C24 0.023(3) 0.020(3) 0.034(3) -0.005(2) 0.009(2) -0.003(2) 
C25 0.023(3) 0.021(3) 0.020(3) -0.002(2) 0.006(2) 0.003(2) 
C26 0.023(3) 0.014(2) 0.022(3) -0.005(2) 0.003(2) -0.002(2) 
C27 0.028(3) 0.017(3) 0.022(3) 0.003(2) 0.008(2) 0.009(2) 
C28 0.036(3) 0.025(3) 0.029(3) 0.000(2) 0.013(2) 0.002(2) 
C29 0.041(3) 0.026(3) 0.033(3) 0.009(3) 0.018(3) 0.006(3) 
C30 0.049(4) 0.047(4) 0.022(3) 0.004(3) 0.011(3) 0.002(3) 
C31 0.039(4) 0.080(5) 0.023(3) 0.000(3) 0.001(3) 0.007(4) 
C32 0.029(3) 0.054(4) 0.025(3) 0.002(3) 0.006(2) -0.003(3) 
C33 0.017(3) 0.029(3) 0.022(3) 0.002(2) 0.005(2) 0.001(2) 
C34 0.019(3) 0.025(3) 0.017(3) 0.003(2) 0.004(2) -0.001(2) 
C35 0.022(3) 0.026(3) 0.014(3) -0.002(2) 0.010(2) -0.003(2) 
C36 0.018(2) 0.018(3) 0.015(2) 0.000(2) 0.0043(19) -0.004(2) 
C37 0.021(2) 0.018(3) 0.016(2) 0.003(2) 0.009(2) 0.004(2) 
C38 0.023(3) 0.020(2) 0.019(3) 0.001(2) 0.009(2) 0.000(2) 
C39 0.024(3) 0.019(3) 0.017(2) -0.004(2) 0.009(2) -0.006(2) 
C40 0.022(3) 0.023(3) 0.013(2) 0.008(2) -0.002(2) 0.001(2) 
C41 0.021(3) 0.024(3) 0.019(3) -0.001(2) 0.002(2) -0.002(2) 
C42 0.022(3) 0.027(3) 0.021(3) 0.001(2) 0.001(2) -0.007(2) 
C43 0.025(3) 0.033(3) 0.028(3) 0.000(3) -0.005(2) -0.006(3) 
C44 0.018(3) 0.029(3) 0.035(3) 0.003(3) 0.012(2) 0.006(2) 
C45 0.026(3) 0.037(3) 0.042(4) 0.013(3) 0.004(3) 0.001(3) 
C46 0.021(3) 0.015(3) 0.023(3) 0.001(2) 0.000(2) 0.003(2) 
C47 0.039(3) 0.020(3) 0.030(3) -0.003(2) 0.008(3) 0.000(3) 
C48 0.021(3) 0.030(3) 0.032(3) -0.010(2) 0.002(2) 0.002(2) 
C49 0.033(3) 0.018(3) 0.058(4) 0.002(3) 0.011(3) 0.006(3) 
C50 0.039(3) 0.031(3) 0.027(3) -0.004(2) -0.002(3) -0.003(3) 
C51 0.043(4) 0.062(5) 0.033(4) -0.012(3) 0.012(3) -0.028(4) 
O1 0.0168(17) 0.0156(17) 0.0210(19) -0.0021(14) 0.0032(14) 0.0010(14) 
O2 0.0143(17) 0.0210(18) 0.0218(19) -0.0019(14) 0.0077(14) 0.0002(14) 
B1 0.014(3) 0.022(3) 0.020(3) 0.005(2) 0.004(2) 0.001(2) 
O3 0.0195(17) 0.0193(19) 0.0207(18) -0.0027(14) 0.0049(14) 0.0019(14) 
O4 0.0164(17) 0.0200(18) 0.0195(18) -0.0025(14) 0.0006(14) 0.0034(14) 
N1 0.022(2) 0.015(2) 0.022(2) -0.0043(17) 0.0044(18) 0.0021(18) 
N2 0.022(2) 0.028(3) 0.039(3) -0.003(2) 0.003(2) -0.002(2) 
C1A 0.052(2) 0.050(2) 0.033(2) 0.017(2) 0.0220(19) -0.009(2) 
C2A 0.0587(19) 0.060(2) 0.0462(19) 0.0160(17) 0.0188(16) -0.0051(18) 
C3A 0.0597(19) 0.061(2) 0.0488(18) 0.0163(16) 0.0177(16) -0.0055(17) 
C4A 0.0600(19) 0.062(2) 0.0511(19) 0.0168(16) 0.0162(16) -0.0054(17) 
C5A 0.060(2) 0.064(2) 0.0526(19) 0.0171(17) 0.0152(17) -0.0063(18) 
C6A 0.055(2) 0.065(3) 0.053(2) 0.017(2) 0.014(2) -0.009(2) 
 
_geom_special_details 
; 
 All esds (except the esd in the dihedral angle between two l.s. planes) 
 are estimated using the full covariance matrix.  The cell esds are taken 
 into account individually in the estimation of esds in distances, angles 
 and torsion angles; correlations between esds in cell parameters are only 
 used when they are defined by crystal symmetry.  An approximate (isotropic) 
 treatment of cell esds is used for estimating esds involving l.s. planes. 
; 
 
loop_ 
 _geom_bond_atom_site_label_1 
 _geom_bond_atom_site_label_2 
 _geom_bond_distance 
 _geom_bond_site_symmetry_2 
 _geom_bond_publ_flag 
C1 C2 1.395(7) . ? 
C1 C10 1.416(7) . ? 
C1 C17 1.491(7) . ? 
C2 O1 1.361(6) . ? 
C2 C3 1.422(7) . ? 
C3 C4 1.371(8) . ? 
C3 C11 1.498(7) . ? 
C4 C5 1.398(8) . ? 
C4 H1 0.9500 . ? 
C5 C10 1.428(7) . ? 
C5 C6 1.429(8) . ? 
C6 C7 1.340(8) . ? 
C6 H2 0.9500 . ? 
C7 C8 1.409(8) . ? 
C7 H3 0.9500 . ? 
C8 C9 1.388(8) . ? 
C8 H4 0.9500 . ? 
C9 C10 1.420(8) . ? 
C9 H5 0.9500 . ? 
C11 C16 1.390(8) . ? 
C11 C12 1.403(8) . ? 
C12 C13 1.397(8) . ? 
C12 H6 0.9500 . ? 
C13 C14 1.358(9) . ? 
C13 H7 0.9500 . ? 
C14 C15 1.399(9) . ? 
C14 H8 0.9500 . ? 
C15 C16 1.365(8) . ? 
C15 H9 0.9500 . ? 
C16 H10 0.9500 . ? 
C17 C18 1.389(7) . ? 
C17 C26 1.421(7) . ? 
C18 O2 1.379(6) . ? 
C18 C19 1.426(7) . ? 
C19 C20 1.370(7) . ? 
C19 C27 1.494(7) . ? 
C20 C21 1.396(8) . ? 
C20 H11 0.9500 . ? 
C21 C22 1.412(7) . ? 
C21 C26 1.452(7) . ? 
C22 C23 1.364(8) . ? 
C22 H12 0.9500 . ? 
C23 C24 1.401(8) . ? 
C23 H13 0.9500 . ? 
C24 C25 1.378(7) . ? 
C24 H14 0.9500 . ? 
C25 C26 1.414(7) . ? 
C25 H15 0.9500 . ? 
C27 C28 1.392(8) . ? 
C27 C32 1.402(8) . ? 
C28 C29 1.379(8) . ? 
C28 H16 0.9500 . ? 
C29 C30 1.377(9) . ? 
C29 H17 0.9500 . ? 
C30 C31 1.348(10) . ? 
C30 H18 0.9500 . ? 
C31 C32 1.398(9) . ? 
C31 H19 0.9500 . ? 
C32 H20 0.9500 . ? 
C33 N1 1.333(7) . ? 
C33 C34 1.391(8) . ? 
C33 H21 0.9500 . ? 
C34 C35 1.401(7) . ? 
C34 C44 1.512(7) . ? 
C35 C36 1.380(7) . ? 
C35 C46 1.513(7) . ? 
C36 N1 1.387(6) . ? 
C36 C37 1.446(7) . ? 
C37 O3 1.331(6) . ? 
C37 C38 1.394(7) . ? 
C38 C39 1.371(7) . ? 
C38 H45 0.9500 . ? 
C39 O4 1.313(6) . ? 
C39 C40 1.436(7) . ? 
C40 C41 1.395(8) . ? 
C40 N2 1.397(7) . ? 
C41 C42 1.417(7) . ? 
C41 C48 1.510(8) . ? 
C42 C43 1.359(9) . ? 
C42 C50 1.514(8) . ? 
C43 N2 1.342(7) . ? 
C43 H22 0.9500 . ? 
C44 C45 1.529(8) . ? 
C44 H23 0.9900 . ? 
C44 H24 0.9900 . ? 
C45 H25 0.9800 . ? 
C45 H26 0.9800 . ? 
C45 H27 0.9800 . ? 
C46 C47 1.522(8) . ? 
C46 H28 0.9900 . ? 
C46 H29 0.9900 . ? 
C47 H30 0.9800 . ? 
C47 H31 0.9800 . ? 
C47 H32 0.9800 . ? 
C48 C49 1.539(9) . ? 
C48 H33 0.9900 . ? 
C48 H34 0.9900 . ? 
C49 H35 0.9800 . ? 
C49 H36 0.9800 . ? 
C49 H37 0.9800 . ? 
C50 C51 1.491(9) . ? 
C50 H38 0.9900 . ? 
C50 H39 0.9900 . ? 
C51 H40 0.9800 . ? 
C51 H41 0.9800 . ? 
C51 H42 0.9800 . ? 
O1 B1 1.445(7) . ? 
O2 B1 1.436(7) . ? 
B1 O3 1.484(6) . ? 
B1 O4 1.503(7) . ? 
N1 H43 0.8800 . ? 
N2 H44 0.8800 . ? 
C1A C2A 1.507(10) . ? 
C1A H46 0.9800 . ? 
C1A H47 0.9800 . ? 
C1A H48 0.9800 . ? 
C2A C3A 1.487(10) . ? 
C2A H49 0.9900 . ? 
C2A H50 0.9900 . ? 
C3A C4A 1.509(11) . ? 
C3A H51 0.9900 . ? 
C3A H52 0.9900 . ? 
C4A C5A 1.578(10) . ? 
C4A H53 0.9900 . ? 
C4A H54 0.9900 . ? 
C5A C6A 1.477(10) . ? 
C5A H55 0.9900 . ? 
C5A H56 0.9900 . ? 
C6A H57 0.9800 . ? 
C6A H58 0.9800 . ? 
C6A H59 0.9800 . ? 
 
loop_ 
 _geom_angle_atom_site_label_1 
 _geom_angle_atom_site_label_2 
 _geom_angle_atom_site_label_3 
 _geom_angle 
 _geom_angle_site_symmetry_1 
 _geom_angle_site_symmetry_3 
 _geom_angle_publ_flag 
C2 C1 C10 119.7(5) . . ? 
C2 C1 C17 117.3(5) . . ? 
C10 C1 C17 122.9(5) . . ? 
O1 C2 C1 118.4(4) . . ? 
O1 C2 C3 120.1(4) . . ? 
C1 C2 C3 121.5(5) . . ? 
C4 C3 C2 117.9(5) . . ? 
C4 C3 C11 121.7(5) . . ? 
C2 C3 C11 120.4(5) . . ? 
C3 C4 C5 122.6(5) . . ? 
C3 C4 H1 118.7 . . ? 
C5 C4 H1 118.7 . . ? 
C4 C5 C10 119.5(5) . . ? 
C4 C5 C6 122.1(5) . . ? 
C10 C5 C6 118.4(5) . . ? 
C7 C6 C5 121.8(5) . . ? 
C7 C6 H2 119.1 . . ? 
C5 C6 H2 119.1 . . ? 
C6 C7 C8 120.8(5) . . ? 
C6 C7 H3 119.6 . . ? 
C8 C7 H3 119.6 . . ? 
C9 C8 C7 119.6(5) . . ? 
C9 C8 H4 120.2 . . ? 
C7 C8 H4 120.2 . . ? 
C8 C9 C10 121.1(5) . . ? 
C8 C9 H5 119.5 . . ? 
C10 C9 H5 119.5 . . ? 
C1 C10 C9 123.0(5) . . ? 
C1 C10 C5 118.6(5) . . ? 
C9 C10 C5 118.3(5) . . ? 
C16 C11 C12 118.9(5) . . ? 
C16 C11 C3 121.6(5) . . ? 
C12 C11 C3 119.5(5) . . ? 
C13 C12 C11 118.6(5) . . ? 
C13 C12 H6 120.7 . . ? 
C11 C12 H6 120.7 . . ? 
C14 C13 C12 121.9(5) . . ? 
C14 C13 H7 119.0 . . ? 
C12 C13 H7 119.0 . . ? 
C13 C14 C15 119.2(6) . . ? 
C13 C14 H8 120.4 . . ? 
C15 C14 H8 120.4 . . ? 
C16 C15 C14 119.9(6) . . ? 
C16 C15 H9 120.1 . . ? 
C14 C15 H9 120.1 . . ? 
C15 C16 C11 121.4(5) . . ? 
C15 C16 H10 119.3 . . ? 
C11 C16 H10 119.3 . . ? 
C18 C17 C26 119.1(4) . . ? 
C18 C17 C1 118.1(4) . . ? 
C26 C17 C1 122.4(4) . . ? 
O2 C18 C17 118.6(4) . . ? 
O2 C18 C19 119.0(4) . . ? 
C17 C18 C19 122.3(4) . . ? 
C20 C19 C18 117.6(5) . . ? 
C20 C19 C27 120.7(5) . . ? 
C18 C19 C27 121.6(4) . . ? 
C19 C20 C21 123.1(5) . . ? 
C19 C20 H11 118.5 . . ? 
C21 C20 H11 118.5 . . ? 
C20 C21 C22 122.8(5) . . ? 
C20 C21 C26 118.8(5) . . ? 
C22 C21 C26 118.4(5) . . ? 
C23 C22 C21 121.7(5) . . ? 
C23 C22 H12 119.2 . . ? 
C21 C22 H12 119.2 . . ? 
C22 C23 C24 120.6(5) . . ? 
C22 C23 H13 119.7 . . ? 
C24 C23 H13 119.7 . . ? 
C25 C24 C23 119.6(5) . . ? 
C25 C24 H14 120.2 . . ? 
C23 C24 H14 120.2 . . ? 
C24 C25 C26 122.1(5) . . ? 
C24 C25 H15 118.9 . . ? 
C26 C25 H15 118.9 . . ? 
C25 C26 C17 123.7(5) . . ? 
C25 C26 C21 117.5(5) . . ? 
C17 C26 C21 118.7(5) . . ? 
C28 C27 C32 118.5(5) . . ? 
C28 C27 C19 121.6(5) . . ? 
C32 C27 C19 119.9(5) . . ? 
C29 C28 C27 120.9(6) . . ? 
C29 C28 H16 119.5 . . ? 
C27 C28 H16 119.5 . . ? 
C30 C29 C28 120.4(6) . . ? 
C30 C29 H17 119.8 . . ? 
C28 C29 H17 119.8 . . ? 
C31 C30 C29 119.3(6) . . ? 
C31 C30 H18 120.4 . . ? 
C29 C30 H18 120.4 . . ? 
C30 C31 C32 122.3(6) . . ? 
C30 C31 H19 118.9 . . ? 
C32 C31 H19 118.9 . . ? 
C31 C32 C27 118.6(6) . . ? 
C31 C32 H20 120.7 . . ? 
C27 C32 H20 120.7 . . ? 
N1 C33 C34 108.1(5) . . ? 
N1 C33 H21 126.0 . . ? 
C34 C33 H21 126.0 . . ? 
C33 C34 C35 107.8(5) . . ? 
C33 C34 C44 125.8(5) . . ? 
C35 C34 C44 126.4(5) . . ? 
C36 C35 C34 106.8(5) . . ? 
C36 C35 C46 128.5(5) . . ? 
C34 C35 C46 124.7(5) . . ? 
C35 C36 N1 107.7(4) . . ? 
C35 C36 C37 133.8(5) . . ? 
N1 C36 C37 118.5(4) . . ? 
O3 C37 C38 120.3(4) . . ? 
O3 C37 C36 114.8(4) . . ? 
C38 C37 C36 124.9(5) . . ? 
C39 C38 C37 120.2(5) . . ? 
C39 C38 H45 119.9 . . ? 
C37 C38 H45 119.9 . . ? 
O4 C39 C38 121.1(5) . . ? 
O4 C39 C40 114.2(4) . . ? 
C38 C39 C40 124.6(5) . . ? 
C41 C40 N2 107.1(4) . . ? 
C41 C40 C39 135.0(5) . . ? 
N2 C40 C39 117.8(5) . . ? 
C40 C41 C42 106.9(5) . . ? 
C40 C41 C48 127.7(5) . . ? 
C42 C41 C48 125.3(5) . . ? 
C43 C42 C41 107.0(5) . . ? 
C43 C42 C50 126.7(5) . . ? 
C41 C42 C50 126.3(5) . . ? 
N2 C43 C42 110.5(5) . . ? 
N2 C43 H22 124.8 . . ? 
C42 C43 H22 124.8 . . ? 
C34 C44 C45 114.0(5) . . ? 
C34 C44 H23 108.8 . . ? 
C45 C44 H23 108.8 . . ? 
C34 C44 H24 108.8 . . ? 
C45 C44 H24 108.8 . . ? 
H23 C44 H24 107.6 . . ? 
C44 C45 H25 109.5 . . ? 
C44 C45 H26 109.5 . . ? 
H25 C45 H26 109.5 . . ? 
C44 C45 H27 109.5 . . ? 
H25 C45 H27 109.5 . . ? 
H26 C45 H27 109.5 . . ? 
C35 C46 C47 112.6(4) . . ? 
C35 C46 H28 109.1 . . ? 
C47 C46 H28 109.1 . . ? 
C35 C46 H29 109.1 . . ? 
C47 C46 H29 109.1 . . ? 
H28 C46 H29 107.8 . . ? 
C46 C47 H30 109.5 . . ? 
C46 C47 H31 109.5 . . ? 
H30 C47 H31 109.5 . . ? 
C46 C47 H32 109.5 . . ? 
H30 C47 H32 109.5 . . ? 
H31 C47 H32 109.5 . . ? 
C41 C48 C49 112.5(5) . . ? 
C41 C48 H33 109.1 . . ? 
C49 C48 H33 109.1 . . ? 
C41 C48 H34 109.1 . . ? 
C49 C48 H34 109.1 . . ? 
H33 C48 H34 107.8 . . ? 
C48 C49 H35 109.5 . . ? 
C48 C49 H36 109.5 . . ? 
H35 C49 H36 109.5 . . ? 
C48 C49 H37 109.5 . . ? 
H35 C49 H37 109.5 . . ? 
H36 C49 H37 109.5 . . ? 
C51 C50 C42 114.8(5) . . ? 
C51 C50 H38 108.6 . . ? 
C42 C50 H38 108.6 . . ? 
C51 C50 H39 108.6 . . ? 
C42 C50 H39 108.6 . . ? 
H38 C50 H39 107.5 . . ? 
C50 C51 H40 109.5 . . ? 
C50 C51 H41 109.5 . . ? 
H40 C51 H41 109.5 . . ? 
C50 C51 H42 109.5 . . ? 
H40 C51 H42 109.5 . . ? 
H41 C51 H42 109.5 . . ? 
C2 O1 B1 114.5(4) . . ? 
C18 O2 B1 112.7(4) . . ? 
O2 B1 O1 114.7(5) . . ? 
O2 B1 O3 107.3(4) . . ? 
O1 B1 O3 110.5(4) . . ? 
O2 B1 O4 109.0(4) . . ? 
O1 B1 O4 105.6(4) . . ? 
O3 B1 O4 109.7(4) . . ? 
C37 O3 B1 117.6(4) . . ? 
C39 O4 B1 118.8(4) . . ? 
C33 N1 C36 109.7(4) . . ? 
C33 N1 H43 125.2 . . ? 
C36 N1 H43 125.2 . . ? 
C43 N2 C40 108.4(5) . . ? 
C43 N2 H44 125.8 . . ? 
C40 N2 H44 125.8 . . ? 
C2A C1A H46 109.5 . . ? 
C2A C1A H47 109.5 . . ? 
H46 C1A H47 109.5 . . ? 
C2A C1A H48 109.5 . . ? 
H46 C1A H48 109.5 . . ? 
H47 C1A H48 109.5 . . ? 
C3A C2A C1A 119.9(7) . . ? 
C3A C2A H49 107.4 . . ? 
C1A C2A H49 107.4 . . ? 
C3A C2A H50 107.4 . . ? 
C1A C2A H50 107.4 . . ? 
H49 C2A H50 106.9 . . ? 
C2A C3A C4A 114.3(7) . . ? 
C2A C3A H51 108.7 . . ? 
C4A C3A H51 108.7 . . ? 
C2A C3A H52 108.7 . . ? 
C4A C3A H52 108.7 . . ? 
H51 C3A H52 107.6 . . ? 
C3A C4A C5A 115.7(7) . . ? 
C3A C4A H53 108.4 . . ? 
C5A C4A H53 108.4 . . ? 
C3A C4A H54 108.4 . . ? 
C5A C4A H54 108.4 . . ? 
H53 C4A H54 107.4 . . ? 
C6A C5A C4A 112.8(6) . . ? 
C6A C5A H55 109.0 . . ? 
C4A C5A H55 109.0 . . ? 
C6A C5A H56 109.0 . . ? 
C4A C5A H56 109.0 . . ? 
H55 C5A H56 107.8 . . ? 
C5A C6A H57 109.5 . . ? 
C5A C6A H58 109.5 . . ? 
H57 C6A H58 109.5 . . ? 
C5A C6A H59 109.5 . . ? 
H57 C6A H59 109.5 . . ? 
H58 C6A H59 109.5 . . ? 
 
loop_ 
 _geom_torsion_atom_site_label_1 
 _geom_torsion_atom_site_label_2 
 _geom_torsion_atom_site_label_3 
 _geom_torsion_atom_site_label_4 
 _geom_torsion 
 _geom_torsion_site_symmetry_1 
 _geom_torsion_site_symmetry_2 
 _geom_torsion_site_symmetry_3 
 _geom_torsion_site_symmetry_4 
 _geom_torsion_publ_flag 
C10 C1 C2 O1 -175.9(4) . . . . ? 
C17 C1 C2 O1 0.3(7) . . . . ? 
C10 C1 C2 C3 3.7(8) . . . . ? 
C17 C1 C2 C3 179.9(5) . . . . ? 
O1 C2 C3 C4 176.8(5) . . . . ? 
C1 C2 C3 C4 -2.9(7) . . . . ? 
O1 C2 C3 C11 -3.9(7) . . . . ? 
C1 C2 C3 C11 176.5(5) . . . . ? 
C2 C3 C4 C5 -0.4(8) . . . . ? 
C11 C3 C4 C5 -179.7(5) . . . . ? 
C3 C4 C5 C10 2.6(8) . . . . ? 
C3 C4 C5 C6 -177.2(5) . . . . ? 
C4 C5 C6 C7 180.0(5) . . . . ? 
C10 C5 C6 C7 0.1(8) . . . . ? 
C5 C6 C7 C8 -0.1(8) . . . . ? 
C6 C7 C8 C9 0.2(8) . . . . ? 
C7 C8 C9 C10 -0.5(8) . . . . ? 
C2 C1 C10 C9 177.1(5) . . . . ? 
C17 C1 C10 C9 1.1(8) . . . . ? 
C2 C1 C10 C5 -1.4(7) . . . . ? 
C17 C1 C10 C5 -177.4(5) . . . . ? 
C8 C9 C10 C1 -177.9(5) . . . . ? 
C8 C9 C10 C5 0.6(7) . . . . ? 
C4 C5 C10 C1 -1.7(7) . . . . ? 
C6 C5 C10 C1 178.2(5) . . . . ? 
C4 C5 C10 C9 179.8(5) . . . . ? 
C6 C5 C10 C9 -0.4(7) . . . . ? 
C4 C3 C11 C16 135.8(6) . . . . ? 
C2 C3 C11 C16 -43.5(7) . . . . ? 
C4 C3 C11 C12 -45.5(7) . . . . ? 
C2 C3 C11 C12 135.2(5) . . . . ? 
C16 C11 C12 C13 -1.7(8) . . . . ? 
C3 C11 C12 C13 179.6(5) . . . . ? 
C11 C12 C13 C14 0.5(9) . . . . ? 
C12 C13 C14 C15 1.5(9) . . . . ? 
C13 C14 C15 C16 -2.3(9) . . . . ? 
C14 C15 C16 C11 1.1(9) . . . . ? 
C12 C11 C16 C15 0.9(8) . . . . ? 
C3 C11 C16 C15 179.6(5) . . . . ? 
C2 C1 C17 C18 -54.0(6) . . . . ? 
C10 C1 C17 C18 122.1(5) . . . . ? 
C2 C1 C17 C26 118.8(5) . . . . ? 
C10 C1 C17 C26 -65.2(7) . . . . ? 
C26 C17 C18 O2 -169.0(4) . . . . ? 
C1 C17 C18 O2 4.0(7) . . . . ? 
C26 C17 C18 C19 7.2(7) . . . . ? 
C1 C17 C18 C19 -179.8(5) . . . . ? 
O2 C18 C19 C20 172.1(4) . . . . ? 
C17 C18 C19 C20 -4.1(7) . . . . ? 
O2 C18 C19 C27 -5.6(7) . . . . ? 
C17 C18 C19 C27 178.2(5) . . . . ? 
C18 C19 C20 C21 -1.7(8) . . . . ? 
C27 C19 C20 C21 176.0(5) . . . . ? 
C19 C20 C21 C22 -172.4(5) . . . . ? 
C19 C20 C21 C26 4.1(8) . . . . ? 
C20 C21 C22 C23 174.6(5) . . . . ? 
C26 C21 C22 C23 -2.0(8) . . . . ? 
C21 C22 C23 C24 2.9(8) . . . . ? 
C22 C23 C24 C25 -1.5(8) . . . . ? 
C23 C24 C25 C26 -0.7(8) . . . . ? 
C24 C25 C26 C17 -174.2(5) . . . . ? 
C24 C25 C26 C21 1.5(7) . . . . ? 
C18 C17 C26 C25 171.1(5) . . . . ? 
C1 C17 C26 C25 -1.6(7) . . . . ? 
C18 C17 C26 C21 -4.5(7) . . . . ? 
C1 C17 C26 C21 -177.2(5) . . . . ? 
C20 C21 C26 C25 -176.8(5) . . . . ? 
C22 C21 C26 C25 -0.1(7) . . . . ? 
C20 C21 C26 C17 -0.9(7) . . . . ? 
C22 C21 C26 C17 175.8(4) . . . . ? 
C20 C19 C27 C28 140.2(5) . . . . ? 
C18 C19 C27 C28 -42.2(7) . . . . ? 
C20 C19 C27 C32 -40.5(7) . . . . ? 
C18 C19 C27 C32 137.1(5) . . . . ? 
C32 C27 C28 C29 1.4(8) . . . . ? 
C19 C27 C28 C29 -179.2(5) . . . . ? 
C27 C28 C29 C30 -1.2(9) . . . . ? 
C28 C29 C30 C31 2.0(10) . . . . ? 
C29 C30 C31 C32 -3.1(12) . . . . ? 
C30 C31 C32 C27 3.4(11) . . . . ? 
C28 C27 C32 C31 -2.4(9) . . . . ? 
C19 C27 C32 C31 178.2(6) . . . . ? 
N1 C33 C34 C35 0.4(6) . . . . ? 
N1 C33 C34 C44 -178.4(5) . . . . ? 
C33 C34 C35 C36 0.2(6) . . . . ? 
C44 C34 C35 C36 179.0(5) . . . . ? 
C33 C34 C35 C46 -178.3(5) . . . . ? 
C44 C34 C35 C46 0.5(8) . . . . ? 
C34 C35 C36 N1 -0.8(6) . . . . ? 
C46 C35 C36 N1 177.7(5) . . . . ? 
C34 C35 C36 C37 176.5(5) . . . . ? 
C46 C35 C36 C37 -5.0(10) . . . . ? 
C35 C36 C37 O3 173.6(5) . . . . ? 
N1 C36 C37 O3 -9.4(6) . . . . ? 
C35 C36 C37 C38 -10.1(9) . . . . ? 
N1 C36 C37 C38 166.9(5) . . . . ? 
O3 C37 C38 C39 4.7(7) . . . . ? 
C36 C37 C38 C39 -171.5(5) . . . . ? 
C37 C38 C39 O4 -8.8(7) . . . . ? 
C37 C38 C39 C40 168.6(5) . . . . ? 
O4 C39 C40 C41 179.8(5) . . . . ? 
C38 C39 C40 C41 2.2(9) . . . . ? 
O4 C39 C40 N2 -0.8(7) . . . . ? 
C38 C39 C40 N2 -178.4(5) . . . . ? 
N2 C40 C41 C42 1.0(6) . . . . ? 
C39 C40 C41 C42 -179.5(6) . . . . ? 
N2 C40 C41 C48 -178.9(5) . . . . ? 
C39 C40 C41 C48 0.6(10) . . . . ? 
C40 C41 C42 C43 -0.3(6) . . . . ? 
C48 C41 C42 C43 179.6(5) . . . . ? 
C40 C41 C42 C50 179.5(5) . . . . ? 
C48 C41 C42 C50 -0.6(9) . . . . ? 
C41 C42 C43 N2 -0.6(7) . . . . ? 
C50 C42 C43 N2 179.6(5) . . . . ? 
C33 C34 C44 C45 99.4(6) . . . . ? 
C35 C34 C44 C45 -79.2(7) . . . . ? 
C36 C35 C46 C47 92.9(7) . . . . ? 
C34 C35 C46 C47 -88.9(6) . . . . ? 
C40 C41 C48 C49 75.4(7) . . . . ? 
C42 C41 C48 C49 -104.6(6) . . . . ? 
C43 C42 C50 C51 -9.6(9) . . . . ? 
C41 C42 C50 C51 170.6(6) . . . . ? 
C1 C2 O1 B1 71.7(6) . . . . ? 
C3 C2 O1 B1 -107.9(5) . . . . ? 
C17 C18 O2 B1 70.9(6) . . . . ? 
C19 C18 O2 B1 -105.4(5) . . . . ? 
C18 O2 B1 O1 -48.4(6) . . . . ? 
C18 O2 B1 O3 -171.5(4) . . . . ? 
C18 O2 B1 O4 69.7(5) . . . . ? 
C2 O1 B1 O2 -43.0(6) . . . . ? 
C2 O1 B1 O3 78.4(5) . . . . ? 
C2 O1 B1 O4 -163.0(4) . . . . ? 
C38 C37 O3 B1 20.9(6) . . . . ? 
C36 C37 O3 B1 -162.6(4) . . . . ? 
O2 B1 O3 C37 -157.2(4) . . . . ? 
O1 B1 O3 C37 77.2(5) . . . . ? 
O4 B1 O3 C37 -38.9(6) . . . . ? 
C38 C39 O4 B1 -12.9(7) . . . . ? 
C40 C39 O4 B1 169.4(4) . . . . ? 
O2 B1 O4 C39 152.4(4) . . . . ? 
O1 B1 O4 C39 -83.9(5) . . . . ? 
O3 B1 O4 C39 35.2(6) . . . . ? 
C34 C33 N1 C36 -0.9(6) . . . . ? 
C35 C36 N1 C33 1.0(6) . . . . ? 
C37 C36 N1 C33 -176.7(4) . . . . ? 
C42 C43 N2 C40 1.3(7) . . . . ? 
C41 C40 N2 C43 -1.4(6) . . . . ? 
C39 C40 N2 C43 179.0(5) . . . . ? 
C1A C2A C3A C4A 179.4(6) . . . . ? 
C2A C3A C4A C5A 177.6(6) . . . . ? 
C3A C4A C5A C6A 57.5(9) . . . . ? 
 
_diffrn_measured_fraction_theta_max    0.998 
_diffrn_reflns_theta_full              24.99 
_diffrn_measured_fraction_theta_full   0.998 
_refine_diff_density_max    1.655 
_refine_diff_density_min   -0.461 
_refine_diff_density_rms    0.081 


#==============================================================================

#     End of CIF

#==============================================================================


data_00512-1 
 
_audit_creation_method            SHELXL-97 
_chemical_name_systematic 
; 
 ? 
; 
_chemical_name_common             ? 
_chemical_melting_point           ? 
_chemical_formula_moiety          'C35 H29 B N2 O4, C H2 Cl2' 
_chemical_formula_sum 
 'C36 H31 B Cl2 N2 O4' 
_chemical_formula_weight          637.34 
 
loop_ 
 _atom_type_symbol 
 _atom_type_description 
 _atom_type_scat_dispersion_real 
 _atom_type_scat_dispersion_imag 
 _atom_type_scat_source 
 'Cl'  'Cl'   0.1484   0.1585 
 'International Tables Vol C Tables 4.2.6.8 and 6.1.1.4' 
 'C'  'C'   0.0033   0.0016 
 'International Tables Vol C Tables 4.2.6.8 and 6.1.1.4' 
 'O'  'O'   0.0106   0.0060 
 'International Tables Vol C Tables 4.2.6.8 and 6.1.1.4' 
 'N'  'N'   0.0061   0.0033 
 'International Tables Vol C Tables 4.2.6.8 and 6.1.1.4' 
 'B'  'B'   0.0013   0.0007 
 'International Tables Vol C Tables 4.2.6.8 and 6.1.1.4' 
 'H'  'H'   0.0000   0.0000 
 'International Tables Vol C Tables 4.2.6.8 and 6.1.1.4' 
 
_symmetry_cell_setting            triclinic 
_symmetry_space_group_name_H-M    'P -1'
_symmetry_space_group_name_Hall   '-P 1'
_symmetry_Int_Tables_number       2 
 
loop_ 
 _symmetry_equiv_pos_as_xyz 
 'x, y, z' 
 '-x, -y, -z' 
 
_cell_length_a                    13.336(7) 
_cell_length_b                    14.772(9) 
_cell_length_c                    16.318(8) 
_cell_angle_alpha                 76.813(18) 
_cell_angle_beta                  77.986(17) 
_cell_angle_gamma                 76.877(19) 
_cell_volume                      3006(3) 
_cell_formula_units_Z             4 
_cell_measurement_temperature     123(2) 
_cell_measurement_reflns_used     ? 
_cell_measurement_theta_min       ? 
_cell_measurement_theta_max       ? 
 
_exptl_crystal_description        'prism' 
_exptl_crystal_colour             'red'
_exptl_crystal_size_max           0.50 
_exptl_crystal_size_mid           0.10 
_exptl_crystal_size_min           0.05 
_exptl_crystal_density_meas       ? 
_exptl_crystal_density_diffrn     1.408 
_exptl_crystal_density_method     'not measured' 
_exptl_crystal_F_000              1328 
_exptl_absorpt_coefficient_mu     0.261 
_exptl_absorpt_correction_type    none
_exptl_absorpt_correction_T_min   0.8804 
_exptl_absorpt_correction_T_max   0.9870 
_exptl_absorpt_process_details    ? 
 
_exptl_special_details 
; 
 ? 
; 
 
_diffrn_ambient_temperature       123(2) 
_diffrn_radiation_wavelength      0.71075 
_diffrn_radiation_type            MoK�a 
_diffrn_radiation_source          'fine-focus sealed tube' 
_diffrn_radiation_monochromator   graphite 
_diffrn_measurement_device_type   'Rigaku RAXIS-RAPID' 
_diffrn_measurement_method        �w
_diffrn_detector_area_resol_mean  10.00 
_diffrn_standards_number          ? 
_diffrn_standards_interval_count  ? 
_diffrn_standards_interval_time   ? 
_diffrn_standards_decay_%         ? 
_diffrn_reflns_number             25034 
_diffrn_reflns_av_R_equivalents   0.1450 
_diffrn_reflns_av_sigmaI/netI     0.2225 
_diffrn_reflns_limit_h_min        -16 
_diffrn_reflns_limit_h_max        16 
_diffrn_reflns_limit_k_min        -18 
_diffrn_reflns_limit_k_max        18 
_diffrn_reflns_limit_l_min        -17 
_diffrn_reflns_limit_l_max        20 
_diffrn_reflns_theta_min          3.02 
_diffrn_reflns_theta_max          26.00 
_reflns_number_total              11577 
_reflns_number_gt                 2829 
_reflns_threshold_expression      >2sigma(I) 
 
_computing_data_collection        'PROCESS-AUTO' 
_computing_cell_refinement        'PROCESS-AUTO'
_computing_data_reduction         'CrystalStructure'
_computing_structure_solution     'SHELXS-97 (Sheldrick, 1990)' 
_computing_structure_refinement   'SHELXL-97 (Sheldrick, 1997)' 
_computing_molecular_graphics     ? 
_computing_publication_material   'CrystalStructure 3.8' 
 
_refine_special_details 
; 
 Refinement of F^2^ against ALL reflections.  The weighted R-factor wR and 
 goodness of fit S are based on F^2^, conventional R-factors R are based 
 on F, with F set to zero for negative F^2^. The threshold expression of 
 F^2^ > 2sigma(F^2^) is used only for calculating R-factors(gt) etc. and is 
 not relevant to the choice of reflections for refinement.  R-factors based 
 on F^2^ are statistically about twice as large as those based on F, and R- 
 factors based on ALL data will be even larger. 
; 
 
_refine_ls_structure_factor_coef  Fsqd  
_refine_ls_matrix_type            full 
_refine_ls_weighting_scheme       calc  
_refine_ls_weighting_details 
 'calc w=1/[�s^2^(Fo^2^)+(0.0922P)^2^+0.0000P] where P=(Fo^2^+2Fc^2^)/3' 
_atom_sites_solution_primary      direct 
_atom_sites_solution_secondary    difmap 
_atom_sites_solution_hydrogens    geom 
_refine_ls_hydrogen_treatment     constr 
_refine_ls_extinction_method      none 
_refine_ls_extinction_coef        ? 
_refine_ls_number_reflns          11577 
_refine_ls_number_parameters      815 
_refine_ls_number_restraints      0 
_refine_ls_R_factor_all           0.2829 
_refine_ls_R_factor_gt            0.0851 
_refine_ls_wR_factor_ref          0.2789 
_refine_ls_wR_factor_gt           0.1795 
_refine_ls_goodness_of_fit_ref    0.909 
_refine_ls_restrained_S_all       0.909 
_refine_ls_shift/su_max           0.001 
_refine_ls_shift/su_mean          0.000 
 
loop_ 
 _atom_site_label 
 _atom_site_type_symbol 
 _atom_site_fract_x 
 _atom_site_fract_y 
 _atom_site_fract_z 
 _atom_site_U_iso_or_equiv 
 _atom_site_adp_type 
 _atom_site_occupancy 
 _atom_site_symmetry_multiplicity 
 _atom_site_calc_flag 
 _atom_site_refinement_flags 
 _atom_site_disorder_assembly 
 _atom_site_disorder_group 
C1 C 0.1815(9) 0.4318(8) 0.3775(8) 0.043(3) Uani 1 1 d . . . 
C2 C 0.1866(10) 0.3380(10) 0.3870(8) 0.046(3) Uani 1 1 d . . . 
C3 C 0.2842(9) 0.2991(8) 0.3455(8) 0.042(3) Uani 1 1 d . . . 
C4 C 0.3338(10) 0.3709(9) 0.3078(8) 0.041(3) Uani 1 1 d . . . 
N1 N 0.2692(7) 0.4524(7) 0.3259(6) 0.038(2) Uani 1 1 d . . . 
H59 H 0.2830 0.5097 0.3067 0.045 Uiso 1 1 calc R . . 
C5 C 0.4260(8) 0.3860(7) 0.2456(7) 0.027(2) Uani 1 1 d . . . 
O1 O 0.5074(6) 0.3156(5) 0.2423(5) 0.0385(19) Uani 1 1 d . . . 
C6 C 0.4297(8) 0.4702(8) 0.1899(7) 0.034(3) Uani 1 1 d . . . 
H1 H 0.3693 0.5188 0.1910 0.041 Uiso 1 1 calc R . . 
C7 C 0.5197(9) 0.4872(8) 0.1314(8) 0.039(3) Uani 1 1 d . . . 
O2 O 0.6016(6) 0.4189(5) 0.1326(5) 0.041(2) Uani 1 1 d . . . 
C8 C 0.5267(9) 0.5733(7) 0.0722(7) 0.034(3) Uani 1 1 d . . . 
C9 C 0.6002(9) 0.6007(8) 0.0032(8) 0.037(3) Uani 1 1 d . . . 
C10 C 0.5616(11) 0.6981(9) -0.0245(7) 0.044(3) Uani 1 1 d . . . 
C11 C 0.4713(9) 0.7271(9) 0.0292(7) 0.038(3) Uani 1 1 d . . . 
N2 N 0.4508(7) 0.6499(7) 0.0862(6) 0.039(2) Uani 1 1 d . . . 
H60 H 0.3960 0.6487 0.1269 0.047 Uiso 1 1 calc R . . 
C12 C 0.0968(11) 0.5041(10) 0.4135(8) 0.063(4) Uani 1 1 d . . . 
H2 H 0.1042 0.5036 0.4722 0.095 Uiso 1 1 calc R . . 
H3 H 0.0287 0.4894 0.4135 0.095 Uiso 1 1 calc R . . 
H4 H 0.1017 0.5670 0.3787 0.095 Uiso 1 1 calc R . . 
C13 C 0.4054(10) 0.8220(8) 0.0299(8) 0.049(4) Uani 1 1 d . . . 
H5 H 0.3693 0.8408 -0.0196 0.074 Uiso 1 1 calc R . . 
H6 H 0.4493 0.8679 0.0273 0.074 Uiso 1 1 calc R . . 
H7 H 0.3538 0.8205 0.0824 0.074 Uiso 1 1 calc R . . 
C14 C 0.1085(12) 0.2777(10) 0.4323(8) 0.056(4) Uani 1 1 d . . . 
H8 H 0.0376 0.3170 0.4395 0.067 Uiso 1 1 calc R . . 
H9 H 0.1250 0.2456 0.4895 0.067 Uiso 1 1 calc R . . 
C15 C 0.1137(10) 0.2057(10) 0.3785(10) 0.071(5) Uani 1 1 d . . . 
H10 H 0.0892 0.2385 0.3242 0.085 Uiso 1 1 calc R . . 
H11 H 0.0666 0.1613 0.4089 0.085 Uiso 1 1 calc R . . 
C16 C 0.2241(14) 0.1503(10) 0.3595(8) 0.064(4) Uani 1 1 d . . . 
C17 C 0.2421(13) 0.0545(10) 0.3592(8) 0.061(4) Uani 1 1 d . . . 
H12 H 0.1845 0.0233 0.3696 0.073 Uiso 1 1 calc R . . 
C18 C 0.3411(16) 0.0041(9) 0.3444(9) 0.070(5) Uani 1 1 d . . . 
H13 H 0.3517 -0.0606 0.3401 0.084 Uiso 1 1 calc R . . 
C19 C 0.4295(13) 0.0477(10) 0.3354(9) 0.062(4) Uani 1 1 d . . . 
H14 H 0.4984 0.0114 0.3308 0.074 Uiso 1 1 calc R . . 
C20 C 0.4114(13) 0.1450(9) 0.3335(9) 0.060(4) Uani 1 1 d . . . 
H15 H 0.4687 0.1763 0.3245 0.073 Uiso 1 1 calc R . . 
C21 C 0.3127(11) 0.1947(9) 0.3445(8) 0.046(3) Uani 1 1 d . . . 
C22 C 0.6190(10) 0.7541(9) -0.1007(8) 0.050(3) Uani 1 1 d . . . 
H16 H 0.6077 0.8207 -0.0938 0.060 Uiso 1 1 calc R . . 
H17 H 0.5920 0.7532 -0.1526 0.060 Uiso 1 1 calc R . . 
C23 C 0.7354(8) 0.7118(7) -0.1106(8) 0.038(3) Uani 1 1 d . . . 
H18 H 0.7702 0.7425 -0.1663 0.045 Uiso 1 1 calc R . . 
H19 H 0.7646 0.7270 -0.0654 0.045 Uiso 1 1 calc R . . 
C24 C 0.7606(10) 0.6072(7) -0.1057(7) 0.038(3) Uani 1 1 d . . . 
C25 C 0.8422(10) 0.5643(10) -0.1567(8) 0.046(3) Uani 1 1 d . . . 
H20 H 0.8837 0.6019 -0.1994 0.055 Uiso 1 1 calc R . . 
C26 C 0.8664(11) 0.4681(9) -0.1484(9) 0.051(4) Uani 1 1 d . . . 
H21 H 0.9265 0.4391 -0.1824 0.061 Uiso 1 1 calc R . . 
C27 C 0.8030(10) 0.4135(8) -0.0904(7) 0.046(3) Uani 1 1 d . . . 
H22 H 0.8179 0.3466 -0.0851 0.055 Uiso 1 1 calc R . . 
C28 C 0.7182(8) 0.4566(9) -0.0403(6) 0.044(3) Uani 1 1 d . . . 
H23 H 0.6759 0.4183 0.0010 0.053 Uiso 1 1 calc R . . 
C29 C 0.6923(9) 0.5535(7) -0.0479(7) 0.037(3) Uani 1 1 d . . . 
B1 B 0.6079(12) 0.3303(11) 0.1908(10) 0.046(4) Uani 1 1 d . . . 
O3 O 0.6539(6) 0.2526(5) 0.1441(5) 0.039(2) Uani 1 1 d . . . 
O4 O 0.6850(6) 0.3245(5) 0.2466(5) 0.0391(19) Uani 1 1 d . . . 
C30 C 0.7538(10) 0.2304(8) 0.1485(7) 0.037(3) Uani 1 1 d . . . 
C31 C 0.8369(11) 0.1790(8) 0.1063(8) 0.048(3) Uani 1 1 d . . . 
H24 H 0.8269 0.1516 0.0620 0.057 Uiso 1 1 calc R . . 
C32 C 0.9357(9) 0.1651(9) 0.1253(9) 0.054(4) Uani 1 1 d . . . 
H25 H 0.9918 0.1265 0.0955 0.064 Uiso 1 1 calc R . . 
C33 C 0.9545(11) 0.2061(9) 0.1868(9) 0.059(4) Uani 1 1 d . . . 
H26 H 1.0232 0.1967 0.1988 0.071 Uiso 1 1 calc R . . 
C34 C 0.8716(10) 0.2616(8) 0.2315(8) 0.042(3) Uani 1 1 d . . . 
H27 H 0.8815 0.2913 0.2743 0.051 Uiso 1 1 calc R . . 
C35 C 0.7752(8) 0.2708(7) 0.2103(7) 0.041(3) Uani 1 1 d . . . 
C36 C 0.5252(11) 0.2728(7) 0.4728(8) 0.046(3) Uani 1 1 d . . . 
C37 C 0.4343(9) 0.3009(8) 0.5264(8) 0.034(3) Uani 1 1 d . . . 
C38 C 0.4000(9) 0.3981(8) 0.4987(8) 0.036(3) Uani 1 1 d . . . 
C39 C 0.4725(9) 0.4305(9) 0.4241(7) 0.040(3) Uani 1 1 d . . . 
N3 N 0.5486(8) 0.3492(7) 0.4146(6) 0.038(2) Uani 1 1 d . . . 
H61 H 0.6050 0.3480 0.3754 0.045 Uiso 1 1 calc R . . 
C40 C 0.4799(9) 0.5141(8) 0.3678(6) 0.032(3) Uani 1 1 d . . . 
O5 O 0.3951(6) 0.5805(5) 0.3683(5) 0.039(2) Uani 1 1 d . . . 
C41 C 0.5675(10) 0.5285(7) 0.3104(7) 0.038(3) Uani 1 1 d . . . 
H28 H 0.6268 0.4788 0.3081 0.045 Uiso 1 1 calc R . . 
C42 C 0.5713(10) 0.6138(9) 0.2560(8) 0.043(3) Uani 1 1 d . . . 
O6 O 0.4920(6) 0.6860(5) 0.2570(5) 0.043(2) Uani 1 1 d . . . 
C43 C 0.6621(10) 0.6274(8) 0.1945(7) 0.039(3) Uani 1 1 d . . . 
C44 C 0.7139(11) 0.7045(9) 0.1541(7) 0.047(3) Uani 1 1 d . . . 
C45 C 0.8136(11) 0.6654(9) 0.1107(8) 0.044(3) Uani 1 1 d . . . 
C46 C 0.8204(11) 0.5681(10) 0.1215(7) 0.049(3) Uani 1 1 d . . . 
N4 N 0.7325(8) 0.5472(7) 0.1731(6) 0.043(3) Uani 1 1 d . . . 
H62 H 0.7206 0.4892 0.1914 0.052 Uiso 1 1 calc R . . 
C47 C 0.5942(10) 0.1803(8) 0.4709(7) 0.046(3) Uani 1 1 d . . . 
H29 H 0.6118 0.1691 0.4122 0.069 Uiso 1 1 calc R . . 
H30 H 0.5586 0.1306 0.5074 0.069 Uiso 1 1 calc R . . 
H31 H 0.6582 0.1794 0.4918 0.069 Uiso 1 1 calc R . . 
C48 C 0.8986(9) 0.4928(9) 0.0882(9) 0.052(3) Uani 1 1 d . . . 
H32 H 0.9085 0.4372 0.1339 0.078 Uiso 1 1 calc R . . 
H33 H 0.9648 0.5149 0.0665 0.078 Uiso 1 1 calc R . . 
H34 H 0.8749 0.4757 0.0417 0.078 Uiso 1 1 calc R . . 
C49 C 0.3812(10) 0.2434(8) 0.6021(7) 0.044(3) Uani 1 1 d . . . 
H35 H 0.3944 0.1766 0.5952 0.053 Uiso 1 1 calc R . . 
H36 H 0.4076 0.2455 0.6539 0.053 Uiso 1 1 calc R . . 
C50 C 0.2668(11) 0.2837(8) 0.6104(8) 0.053(4) Uani 1 1 d . . . 
H37 H 0.2307 0.2534 0.6658 0.064 Uiso 1 1 calc R . . 
H38 H 0.2385 0.2691 0.5645 0.064 Uiso 1 1 calc R . . 
C51 C 0.2450(9) 0.3897(9) 0.6051(8) 0.042(3) Uani 1 1 d . . . 
C52 C 0.1600(11) 0.4310(9) 0.6559(8) 0.051(3) Uani 1 1 d . . . 
H39 H 0.1180 0.3914 0.6957 0.061 Uiso 1 1 calc R . . 
C53 C 0.1317(10) 0.5297(9) 0.6522(8) 0.043(3) Uani 1 1 d . . . 
H40 H 0.0736 0.5560 0.6898 0.052 Uiso 1 1 calc R . . 
C54 C 0.1899(9) 0.5856(9) 0.5935(7) 0.046(3) Uani 1 1 d . . . 
H41 H 0.1700 0.6524 0.5877 0.055 Uiso 1 1 calc R . . 
C55 C 0.2779(9) 0.5474(7) 0.5418(8) 0.040(3) Uani 1 1 d . . . 
H42 H 0.3203 0.5881 0.5040 0.048 Uiso 1 1 calc R . . 
C56 C 0.3056(8) 0.4493(9) 0.5441(7) 0.039(3) Uani 1 1 d . . . 
C57 C 0.8916(10) 0.7255(10) 0.0692(9) 0.058(4) Uani 1 1 d . . . 
H43 H 0.8788 0.7569 0.0110 0.070 Uiso 1 1 calc R . . 
H44 H 0.9628 0.6866 0.0652 0.070 Uiso 1 1 calc R . . 
C58 C 0.8807(12) 0.7996(9) 0.1245(7) 0.064(4) Uani 1 1 d . . . 
H45 H 0.9033 0.7676 0.1797 0.076 Uiso 1 1 calc R . . 
H46 H 0.9273 0.8449 0.0955 0.076 Uiso 1 1 calc R . . 
C59 C 0.7741(11) 0.8513(9) 0.1403(8) 0.046(3) Uani 1 1 d . . . 
C60 C 0.7550(14) 0.9452(11) 0.1424(10) 0.071(5) Uani 1 1 d . . . 
H47 H 0.8122 0.9763 0.1353 0.085 Uiso 1 1 calc R . . 
C61 C 0.6548(15) 0.9965(11) 0.1545(10) 0.071(4) Uani 1 1 d . . . 
H48 H 0.6435 1.0622 0.1552 0.085 Uiso 1 1 calc R . . 
C62 C 0.5731(14) 0.9537(9) 0.1654(9) 0.066(4) Uani 1 1 d . . . 
H49 H 0.5039 0.9890 0.1732 0.080 Uiso 1 1 calc R . . 
C63 C 0.5901(10) 0.8577(8) 0.1651(7) 0.043(3) Uani 1 1 d . . . 
H50 H 0.5321 0.8279 0.1720 0.052 Uiso 1 1 calc R . . 
C64 C 0.6930(11) 0.8028(9) 0.1547(7) 0.047(3) Uani 1 1 d . . . 
B2 B 0.3917(11) 0.6744(8) 0.3084(9) 0.036(3) Uani 1 1 d . . . 
O7 O 0.3163(6) 0.6749(5) 0.2517(5) 0.042(2) Uani 1 1 d . . . 
O8 O 0.3464(7) 0.7472(5) 0.3568(5) 0.045(2) Uani 1 1 d . . . 
C65 C 0.2251(10) 0.7270(7) 0.2834(7) 0.038(3) Uani 1 1 d . . . 
C66 C 0.1277(10) 0.7403(9) 0.2687(9) 0.051(3) Uani 1 1 d . . . 
H51 H 0.1138 0.7129 0.2259 0.061 Uiso 1 1 calc R . . 
C67 C 0.0466(9) 0.7938(8) 0.3155(8) 0.046(3) Uani 1 1 d . . . 
H52 H -0.0223 0.8038 0.3037 0.055 Uiso 1 1 calc R . . 
C68 C 0.0650(12) 0.8327(9) 0.3791(7) 0.054(4) Uani 1 1 d . . . 
H53 H 0.0077 0.8671 0.4117 0.065 Uiso 1 1 calc R . . 
C69 C 0.1655(10) 0.8230(9) 0.3969(7) 0.044(3) Uani 1 1 d . . . 
H54 H 0.1797 0.8510 0.4392 0.053 Uiso 1 1 calc R . . 
C70 C 0.2429(9) 0.7684(8) 0.3471(8) 0.041(3) Uani 1 1 d . . . 
C71 C 0.1630(12) 0.9697(11) 0.1640(11) 0.079(5) Uani 1 1 d . . . 
H55 H 0.1069 1.0001 0.2048 0.095 Uiso 1 1 calc R . . 
H56 H 0.2023 0.9126 0.1967 0.095 Uiso 1 1 calc R . . 
Cl1 Cl 0.1078(3) 0.9365(3) 0.0914(3) 0.0710(11) Uani 1 1 d . . . 
Cl2 Cl 0.2460(4) 1.0473(3) 0.1141(4) 0.0934(15) Uani 1 1 d . . . 
C72 C 0.8359(12) 0.0279(9) 0.3349(8) 0.061(4) Uani 1 1 d . . . 
H57 H 0.7970 0.0842 0.3009 0.073 Uiso 1 1 calc R . . 
H58 H 0.8921 -0.0039 0.2952 0.073 Uiso 1 1 calc R . . 
Cl3 Cl 0.8919(3) 0.0647(3) 0.4087(3) 0.0725(12) Uani 1 1 d . . . 
Cl4 Cl 0.7535(4) -0.0475(3) 0.3863(3) 0.0915(15) Uani 1 1 d . . . 
 
loop_ 
 _atom_site_aniso_label 
 _atom_site_aniso_U_11 
 _atom_site_aniso_U_22 
 _atom_site_aniso_U_33 
 _atom_site_aniso_U_23 
 _atom_site_aniso_U_13 
 _atom_site_aniso_U_12 
C1 0.032(7) 0.038(7) 0.060(8) -0.001(6) -0.020(6) -0.005(6) 
C2 0.036(7) 0.068(9) 0.032(6) 0.013(6) -0.017(6) -0.019(6) 
C3 0.040(7) 0.034(6) 0.057(7) 0.004(6) -0.023(6) -0.017(5) 
C4 0.040(7) 0.040(7) 0.043(7) -0.005(6) -0.008(6) -0.007(6) 
N1 0.036(6) 0.049(6) 0.029(5) 0.009(5) -0.012(5) -0.019(5) 
C5 0.027(6) 0.024(5) 0.031(5) 0.006(5) -0.021(5) -0.002(5) 
O1 0.033(5) 0.041(5) 0.042(5) 0.001(4) -0.012(4) -0.014(4) 
C6 0.021(5) 0.043(7) 0.036(6) -0.001(6) -0.012(5) -0.002(5) 
C7 0.031(6) 0.036(6) 0.056(7) -0.012(6) -0.018(6) -0.004(5) 
O2 0.033(5) 0.030(4) 0.053(5) 0.007(4) -0.013(4) -0.006(4) 
C8 0.042(7) 0.021(5) 0.042(6) 0.012(5) -0.026(6) -0.012(5) 
C9 0.044(7) 0.025(6) 0.039(7) 0.004(5) -0.018(6) -0.003(5) 
C10 0.061(8) 0.043(7) 0.027(6) 0.008(6) -0.016(6) -0.014(6) 
C11 0.038(7) 0.051(7) 0.029(6) -0.018(6) -0.006(5) -0.001(5) 
N2 0.034(6) 0.035(5) 0.038(5) 0.007(5) -0.007(5) 0.004(4) 
C12 0.071(10) 0.068(10) 0.040(7) -0.010(7) -0.005(7) 0.004(8) 
C13 0.052(8) 0.029(6) 0.058(8) -0.005(6) -0.019(7) 0.015(6) 
C14 0.073(10) 0.058(8) 0.038(7) -0.001(7) -0.012(7) -0.023(7) 
C15 0.043(8) 0.068(9) 0.110(12) -0.013(9) -0.014(8) -0.029(7) 
C16 0.112(13) 0.052(9) 0.038(7) 0.014(7) -0.029(8) -0.045(9) 
C17 0.092(12) 0.053(9) 0.040(7) 0.022(7) -0.020(8) -0.041(9) 
C18 0.134(16) 0.028(7) 0.054(9) 0.000(7) -0.024(10) -0.029(9) 
C19 0.083(11) 0.051(8) 0.053(9) 0.005(7) -0.034(8) -0.010(8) 
C20 0.098(12) 0.035(7) 0.046(8) 0.010(6) -0.019(8) -0.020(8) 
C21 0.072(9) 0.034(6) 0.039(7) 0.020(5) -0.033(7) -0.026(6) 
C22 0.059(8) 0.046(7) 0.039(7) -0.019(6) -0.003(6) 0.008(6) 
C23 0.028(6) 0.039(6) 0.046(7) 0.014(6) -0.021(5) -0.016(5) 
C24 0.059(8) 0.025(6) 0.033(6) 0.013(5) -0.017(6) -0.024(5) 
C25 0.038(7) 0.065(9) 0.034(6) -0.004(7) -0.002(6) -0.014(6) 
C26 0.050(8) 0.044(8) 0.055(8) -0.008(7) -0.019(7) 0.007(6) 
C27 0.065(8) 0.030(6) 0.045(7) 0.020(5) -0.023(6) -0.029(6) 
C28 0.034(6) 0.066(8) 0.017(5) 0.005(5) 0.007(5) 0.001(6) 
C29 0.053(7) 0.019(5) 0.027(6) 0.004(5) -0.007(5) 0.008(5) 
B1 0.045(8) 0.052(9) 0.052(9) -0.012(8) -0.014(7) -0.022(7) 
O3 0.040(5) 0.037(5) 0.043(5) -0.005(4) -0.018(4) -0.005(4) 
O4 0.048(5) 0.031(4) 0.035(4) 0.009(4) -0.014(4) -0.009(4) 
C30 0.055(8) 0.033(6) 0.027(5) -0.002(5) -0.011(6) -0.018(6) 
C31 0.067(9) 0.019(5) 0.052(7) -0.008(6) -0.004(7) 0.001(6) 
C32 0.032(7) 0.035(7) 0.083(10) 0.000(7) -0.004(7) 0.002(5) 
C33 0.064(9) 0.051(8) 0.071(10) -0.003(8) -0.023(8) -0.023(7) 
C34 0.050(8) 0.036(7) 0.034(6) -0.005(6) -0.001(6) 0.000(6) 
C35 0.029(6) 0.025(6) 0.047(7) 0.012(5) 0.004(5) 0.012(5) 
C36 0.071(9) 0.015(5) 0.051(7) 0.020(5) -0.029(7) -0.012(5) 
C37 0.031(6) 0.026(6) 0.048(7) -0.007(5) -0.013(5) -0.005(5) 
C38 0.036(7) 0.036(6) 0.042(7) -0.001(6) -0.023(6) -0.012(5) 
C39 0.033(6) 0.050(7) 0.029(6) -0.001(6) 0.001(5) -0.001(6) 
N3 0.042(6) 0.036(5) 0.037(5) -0.008(5) -0.007(5) -0.008(5) 
C40 0.051(7) 0.033(6) 0.009(4) 0.009(4) -0.006(5) -0.012(5) 
O5 0.048(5) 0.024(4) 0.034(4) 0.009(3) -0.003(4) -0.001(4) 
C41 0.069(8) 0.018(5) 0.025(6) 0.005(5) -0.011(6) -0.015(5) 
C42 0.061(8) 0.038(7) 0.032(6) -0.002(6) -0.008(6) -0.017(6) 
O6 0.058(6) 0.019(4) 0.041(5) 0.006(4) -0.005(4) -0.002(4) 
C43 0.048(7) 0.039(7) 0.031(6) 0.009(5) -0.017(6) -0.016(6) 
C44 0.070(9) 0.055(8) 0.016(5) 0.007(5) -0.016(6) -0.021(7) 
C45 0.058(8) 0.038(7) 0.038(7) -0.001(6) -0.011(6) -0.016(6) 
C46 0.061(9) 0.066(9) 0.025(6) 0.000(6) -0.013(6) -0.025(7) 
N4 0.047(6) 0.030(5) 0.047(6) 0.000(5) -0.007(5) -0.006(5) 
C47 0.059(8) 0.042(7) 0.035(7) 0.008(6) -0.011(6) -0.016(6) 
C48 0.036(7) 0.059(9) 0.064(9) -0.011(7) -0.008(6) -0.016(6) 
C49 0.068(9) 0.031(6) 0.034(6) 0.019(5) -0.019(6) -0.026(6) 
C50 0.080(10) 0.040(7) 0.033(6) -0.001(6) -0.005(7) -0.007(7) 
C51 0.030(6) 0.048(7) 0.043(7) -0.004(6) -0.011(6) 0.006(6) 
C52 0.063(9) 0.039(7) 0.047(8) 0.007(6) -0.011(7) -0.015(6) 
C53 0.040(7) 0.055(8) 0.030(6) 0.000(6) -0.001(5) -0.012(6) 
C54 0.042(7) 0.052(7) 0.039(7) -0.022(6) -0.013(6) 0.022(6) 
C55 0.057(8) 0.017(5) 0.056(7) -0.006(5) -0.031(6) -0.005(5) 
C56 0.028(6) 0.058(8) 0.038(6) -0.007(6) -0.023(5) -0.011(5) 
C57 0.040(7) 0.075(10) 0.057(8) 0.020(8) -0.016(7) -0.030(7) 
C58 0.113(13) 0.063(9) 0.026(6) 0.023(6) -0.024(7) -0.061(9) 
C59 0.054(8) 0.037(7) 0.050(8) 0.009(6) -0.017(7) -0.022(6) 
C60 0.091(13) 0.058(10) 0.074(11) 0.000(8) -0.023(10) -0.040(9) 
C61 0.101(14) 0.055(9) 0.058(9) 0.013(8) -0.018(9) -0.039(9) 
C62 0.111(13) 0.030(7) 0.052(9) 0.001(7) -0.007(9) -0.017(8) 
C63 0.058(8) 0.046(7) 0.028(6) 0.001(6) -0.006(6) -0.023(6) 
C64 0.062(8) 0.037(7) 0.031(6) -0.001(6) 0.002(6) -0.006(6) 
B2 0.045(8) 0.011(5) 0.045(8) 0.003(5) -0.013(7) 0.006(5) 
O7 0.038(5) 0.033(4) 0.052(5) -0.011(4) -0.011(4) 0.009(4) 
O8 0.054(6) 0.031(5) 0.045(5) 0.003(4) -0.013(4) -0.008(4) 
C65 0.064(8) 0.030(6) 0.035(6) 0.001(5) -0.034(6) -0.022(5) 
C66 0.053(8) 0.051(8) 0.056(8) -0.004(7) -0.025(7) -0.017(6) 
C67 0.025(6) 0.045(7) 0.054(8) -0.005(6) -0.002(6) 0.013(5) 
C68 0.087(11) 0.042(7) 0.027(6) -0.003(6) -0.005(7) -0.006(7) 
C69 0.053(8) 0.046(7) 0.034(6) 0.007(6) -0.018(6) -0.016(6) 
C70 0.038(7) 0.029(6) 0.045(7) 0.012(5) -0.010(6) 0.002(5) 
C71 0.070(10) 0.074(10) 0.108(12) -0.006(9) -0.067(9) -0.006(8) 
Cl1 0.076(3) 0.062(2) 0.082(3) -0.014(2) -0.025(2) -0.015(2) 
Cl2 0.100(4) 0.062(3) 0.123(4) 0.004(3) -0.030(3) -0.036(3) 
C72 0.092(11) 0.039(7) 0.049(7) 0.008(6) -0.008(7) -0.027(7) 
Cl3 0.086(3) 0.059(2) 0.078(3) -0.016(2) -0.029(2) -0.008(2) 
Cl4 0.105(4) 0.068(3) 0.111(4) 0.007(3) -0.034(3) -0.047(3) 
 
_geom_special_details 
; 
 All esds (except the esd in the dihedral angle between two l.s. planes) 
 are estimated using the full covariance matrix.  The cell esds are taken 
 into account individually in the estimation of esds in distances, angles 
 and torsion angles; correlations between esds in cell parameters are only 
 used when they are defined by crystal symmetry.  An approximate (isotropic) 
 treatment of cell esds is used for estimating esds involving l.s. planes. 
; 
 
loop_ 
 _geom_bond_atom_site_label_1 
 _geom_bond_atom_site_label_2 
 _geom_bond_distance 
 _geom_bond_site_symmetry_2 
 _geom_bond_publ_flag 
C1 C2 1.346(17) . ? 
C1 N1 1.343(15) . ? 
C1 C12 1.492(16) . ? 
C2 C3 1.398(17) . ? 
C2 C14 1.492(19) . ? 
C3 C4 1.340(17) . ? 
C3 C21 1.505(16) . ? 
C4 N1 1.366(14) . ? 
C4 C5 1.447(16) . ? 
N1 H59 0.8800 . ? 
C5 O1 1.323(11) . ? 
C5 C6 1.366(15) . ? 
O1 B1 1.459(17) . ? 
C6 C7 1.403(16) . ? 
C6 H1 0.9500 . ? 
C7 O2 1.308(12) . ? 
C7 C8 1.419(16) . ? 
O2 B1 1.428(17) . ? 
C8 N2 1.364(12) . ? 
C8 C9 1.379(16) . ? 
C9 C10 1.416(15) . ? 
C9 C29 1.463(15) . ? 
C10 C11 1.380(16) . ? 
C10 C22 1.496(18) . ? 
C11 N2 1.338(15) . ? 
C11 C13 1.477(14) . ? 
N2 H60 0.8800 . ? 
C12 H2 0.9800 . ? 
C12 H3 0.9800 . ? 
C12 H4 0.9800 . ? 
C13 H5 0.9800 . ? 
C13 H6 0.9800 . ? 
C13 H7 0.9800 . ? 
C14 C15 1.508(17) . ? 
C14 H8 0.9900 . ? 
C14 H9 0.9900 . ? 
C15 C16 1.52(2) . ? 
C15 H10 0.9900 . ? 
C15 H11 0.9900 . ? 
C16 C17 1.381(18) . ? 
C16 C21 1.43(2) . ? 
C17 C18 1.36(2) . ? 
C17 H12 0.9500 . ? 
C18 C19 1.43(2) . ? 
C18 H13 0.9500 . ? 
C19 C20 1.397(18) . ? 
C19 H14 0.9500 . ? 
C20 C21 1.351(19) . ? 
C20 H15 0.9500 . ? 
C22 C23 1.525(15) . ? 
C22 H16 0.9900 . ? 
C22 H17 0.9900 . ? 
C23 C24 1.493(14) . ? 
C23 H18 0.9900 . ? 
C23 H19 0.9900 . ? 
C24 C25 1.353(16) . ? 
C24 C29 1.406(17) . ? 
C25 C26 1.365(17) . ? 
C25 H20 0.9500 . ? 
C26 C27 1.374(18) . ? 
C26 H21 0.9500 . ? 
C27 C28 1.371(16) . ? 
C27 H22 0.9500 . ? 
C28 C29 1.378(15) . ? 
C28 H23 0.9500 . ? 
B1 O3 1.470(15) . ? 
B1 O4 1.486(16) . ? 
O3 C30 1.311(14) . ? 
O4 C35 1.383(12) . ? 
C30 C31 1.348(16) . ? 
C30 C35 1.388(16) . ? 
C31 C32 1.376(18) . ? 
C31 H24 0.9500 . ? 
C32 C33 1.373(18) . ? 
C32 H25 0.9500 . ? 
C33 C34 1.398(17) . ? 
C33 H26 0.9500 . ? 
C34 C35 1.369(17) . ? 
C34 H27 0.9500 . ? 
C36 N3 1.349(15) . ? 
C36 C37 1.379(17) . ? 
C36 C47 1.466(15) . ? 
C37 C38 1.402(15) . ? 
C37 C49 1.477(16) . ? 
C38 C39 1.450(16) . ? 
C38 C56 1.462(15) . ? 
C39 C40 1.371(16) . ? 
C39 N3 1.401(13) . ? 
N3 H61 0.8800 . ? 
C40 O5 1.318(12) . ? 
C40 C41 1.362(16) . ? 
O5 B2 1.502(14) . ? 
C41 C42 1.371(16) . ? 
C41 H28 0.9500 . ? 
C42 O6 1.321(13) . ? 
C42 C43 1.423(17) . ? 
O6 B2 1.447(16) . ? 
C43 N4 1.399(14) . ? 
C43 C44 1.425(17) . ? 
C44 C64 1.417(17) . ? 
C44 C45 1.430(18) . ? 
C45 C46 1.392(17) . ? 
C45 C57 1.477(19) . ? 
C46 N4 1.346(16) . ? 
C46 C48 1.460(16) . ? 
N4 H62 0.8800 . ? 
C47 H29 0.9800 . ? 
C47 H30 0.9800 . ? 
C47 H31 0.9800 . ? 
C48 H32 0.9800 . ? 
C48 H33 0.9800 . ? 
C48 H34 0.9800 . ? 
C49 C50 1.496(17) . ? 
C49 H35 0.9900 . ? 
C49 H36 0.9900 . ? 
C50 C51 1.512(16) . ? 
C50 H37 0.9900 . ? 
C50 H38 0.9900 . ? 
C51 C52 1.368(16) . ? 
C51 C56 1.417(18) . ? 
C52 C53 1.411(17) . ? 
C52 H39 0.9500 . ? 
C53 C54 1.349(18) . ? 
C53 H40 0.9500 . ? 
C54 C55 1.383(15) . ? 
C54 H41 0.9500 . ? 
C55 C56 1.406(15) . ? 
C55 H42 0.9500 . ? 
C57 C58 1.535(18) . ? 
C57 H43 0.9900 . ? 
C57 H44 0.9900 . ? 
C58 C59 1.454(19) . ? 
C58 H45 0.9900 . ? 
C58 H46 0.9900 . ? 
C59 C64 1.381(19) . ? 
C59 C60 1.360(18) . ? 
C60 C61 1.38(2) . ? 
C60 H47 0.9500 . ? 
C61 C62 1.34(2) . ? 
C61 H48 0.9500 . ? 
C62 C63 1.385(16) . ? 
C62 H49 0.9500 . ? 
C63 C64 1.424(17) . ? 
C63 H50 0.9500 . ? 
B2 O8 1.428(14) . ? 
B2 O7 1.499(16) . ? 
O7 C65 1.354(13) . ? 
O8 C70 1.378(14) . ? 
C65 C66 1.332(16) . ? 
C65 C70 1.403(16) . ? 
C66 C67 1.386(16) . ? 
C66 H51 0.9500 . ? 
C67 C68 1.382(17) . ? 
C67 H52 0.9500 . ? 
C68 C69 1.399(19) . ? 
C68 H53 0.9500 . ? 
C69 C70 1.396(16) . ? 
C69 H54 0.9500 . ? 
C71 Cl2 1.725(17) . ? 
C71 Cl1 1.725(14) . ? 
C71 H55 0.9900 . ? 
C71 H56 0.9900 . ? 
C72 Cl4 1.702(14) . ? 
C72 Cl3 1.777(14) . ? 
C72 H57 0.9900 . ? 
C72 H58 0.9900 . ? 
 
loop_ 
 _geom_angle_atom_site_label_1 
 _geom_angle_atom_site_label_2 
 _geom_angle_atom_site_label_3 
 _geom_angle 
 _geom_angle_site_symmetry_1 
 _geom_angle_site_symmetry_3 
 _geom_angle_publ_flag 
C2 C1 N1 107.1(11) . . ? 
C2 C1 C12 129.2(13) . . ? 
N1 C1 C12 123.6(12) . . ? 
C1 C2 C3 108.3(12) . . ? 
C1 C2 C14 130.5(12) . . ? 
C3 C2 C14 121.3(12) . . ? 
C4 C3 C2 107.1(11) . . ? 
C4 C3 C21 132.1(11) . . ? 
C2 C3 C21 120.6(12) . . ? 
C3 C4 N1 107.6(11) . . ? 
C3 C4 C5 137.6(11) . . ? 
N1 C4 C5 114.0(11) . . ? 
C1 N1 C4 109.7(11) . . ? 
C1 N1 H59 125.1 . . ? 
C4 N1 H59 125.1 . . ? 
O1 C5 C6 120.0(10) . . ? 
O1 C5 C4 118.5(10) . . ? 
C6 C5 C4 121.5(9) . . ? 
C5 O1 B1 121.2(10) . . ? 
C5 C6 C7 122.2(9) . . ? 
C5 C6 H1 118.9 . . ? 
C7 C6 H1 118.9 . . ? 
O2 C7 C6 117.1(11) . . ? 
O2 C7 C8 118.9(11) . . ? 
C6 C7 C8 124.0(10) . . ? 
C7 O2 B1 125.2(10) . . ? 
N2 C8 C9 109.2(10) . . ? 
N2 C8 C7 117.1(10) . . ? 
C9 C8 C7 133.6(10) . . ? 
C8 C9 C10 104.2(10) . . ? 
C8 C9 C29 136.5(10) . . ? 
C10 C9 C29 118.9(11) . . ? 
C11 C10 C9 109.7(11) . . ? 
C11 C10 C22 129.6(11) . . ? 
C9 C10 C22 120.7(11) . . ? 
N2 C11 C10 106.4(10) . . ? 
N2 C11 C13 123.3(10) . . ? 
C10 C11 C13 130.3(12) . . ? 
C11 N2 C8 110.5(10) . . ? 
C11 N2 H60 124.8 . . ? 
C8 N2 H60 124.8 . . ? 
C1 C12 H2 109.5 . . ? 
C1 C12 H3 109.5 . . ? 
H2 C12 H3 109.5 . . ? 
C1 C12 H4 109.5 . . ? 
H2 C12 H4 109.5 . . ? 
H3 C12 H4 109.5 . . ? 
C11 C13 H5 109.5 . . ? 
C11 C13 H6 109.5 . . ? 
H5 C13 H6 109.5 . . ? 
C11 C13 H7 109.5 . . ? 
H5 C13 H7 109.5 . . ? 
H6 C13 H7 109.5 . . ? 
C2 C14 C15 107.1(11) . . ? 
C2 C14 H8 110.3 . . ? 
C15 C14 H8 110.3 . . ? 
C2 C14 H9 110.3 . . ? 
C15 C14 H9 110.3 . . ? 
H8 C14 H9 108.5 . . ? 
C14 C15 C16 111.6(12) . . ? 
C14 C15 H10 109.3 . . ? 
C16 C15 H10 109.3 . . ? 
C14 C15 H11 109.3 . . ? 
C16 C15 H11 109.3 . . ? 
H10 C15 H11 108.0 . . ? 
C17 C16 C21 117.8(15) . . ? 
C17 C16 C15 120.9(14) . . ? 
C21 C16 C15 121.2(12) . . ? 
C16 C17 C18 121.1(15) . . ? 
C16 C17 H12 119.5 . . ? 
C18 C17 H12 119.5 . . ? 
C17 C18 C19 120.6(13) . . ? 
C17 C18 H13 119.7 . . ? 
C19 C18 H13 119.7 . . ? 
C20 C19 C18 118.1(14) . . ? 
C20 C19 H14 121.0 . . ? 
C18 C19 H14 121.0 . . ? 
C21 C20 C19 120.2(15) . . ? 
C21 C20 H15 119.9 . . ? 
C19 C20 H15 119.9 . . ? 
C20 C21 C16 121.9(13) . . ? 
C20 C21 C3 124.7(12) . . ? 
C16 C21 C3 113.4(12) . . ? 
C10 C22 C23 109.8(10) . . ? 
C10 C22 H16 109.7 . . ? 
C23 C22 H16 109.7 . . ? 
C10 C22 H17 109.7 . . ? 
C23 C22 H17 109.7 . . ? 
H16 C22 H17 108.2 . . ? 
C24 C23 C22 114.4(10) . . ? 
C24 C23 H18 108.6 . . ? 
C22 C23 H18 108.6 . . ? 
C24 C23 H19 108.6 . . ? 
C22 C23 H19 108.6 . . ? 
H18 C23 H19 107.6 . . ? 
C25 C24 C29 120.1(10) . . ? 
C25 C24 C23 122.7(11) . . ? 
C29 C24 C23 117.1(10) . . ? 
C26 C25 C24 121.5(13) . . ? 
C26 C25 H20 119.2 . . ? 
C24 C25 H20 119.2 . . ? 
C27 C26 C25 119.5(11) . . ? 
C27 C26 H21 120.2 . . ? 
C25 C26 H21 120.2 . . ? 
C26 C27 C28 119.4(11) . . ? 
C26 C27 H22 120.3 . . ? 
C28 C27 H22 120.3 . . ? 
C27 C28 C29 122.0(11) . . ? 
C27 C28 H23 119.0 . . ? 
C29 C28 H23 119.0 . . ? 
C28 C29 C24 117.2(10) . . ? 
C28 C29 C9 122.7(11) . . ? 
C24 C29 C9 120.1(10) . . ? 
O2 B1 O1 113.1(11) . . ? 
O2 B1 O3 109.8(11) . . ? 
O1 B1 O3 110.7(10) . . ? 
O2 B1 O4 108.8(11) . . ? 
O1 B1 O4 110.4(11) . . ? 
O3 B1 O4 103.6(10) . . ? 
C30 O3 B1 107.6(9) . . ? 
C35 O4 B1 104.2(9) . . ? 
O3 C30 C31 134.0(11) . . ? 
O3 C30 C35 110.4(9) . . ? 
C31 C30 C35 115.6(12) . . ? 
C30 C31 C32 122.0(12) . . ? 
C30 C31 H24 119.0 . . ? 
C32 C31 H24 119.0 . . ? 
C31 C32 C33 121.0(11) . . ? 
C31 C32 H25 119.5 . . ? 
C33 C32 H25 119.5 . . ? 
C34 C33 C32 119.4(13) . . ? 
C34 C33 H26 120.3 . . ? 
C32 C33 H26 120.3 . . ? 
C35 C34 C33 116.3(11) . . ? 
C35 C34 H27 121.8 . . ? 
C33 C34 H27 121.8 . . ? 
C34 C35 O4 124.2(11) . . ? 
C34 C35 C30 125.6(9) . . ? 
O4 C35 C30 110.2(11) . . ? 
N3 C36 C37 108.5(10) . . ? 
N3 C36 C47 119.8(12) . . ? 
C37 C36 C47 131.8(11) . . ? 
C36 C37 C38 107.8(11) . . ? 
C36 C37 C49 128.2(10) . . ? 
C38 C37 C49 123.9(10) . . ? 
C37 C38 C39 108.2(10) . . ? 
C37 C38 C56 120.8(11) . . ? 
C39 C38 C56 131.0(11) . . ? 
C40 C39 N3 120.5(10) . . ? 
C40 C39 C38 136.1(10) . . ? 
N3 C39 C38 103.4(10) . . ? 
C36 N3 C39 112.0(10) . . ? 
C36 N3 H61 124.0 . . ? 
C39 N3 H61 124.0 . . ? 
O5 C40 C39 116.6(10) . . ? 
O5 C40 C41 120.2(10) . . ? 
C39 C40 C41 123.1(10) . . ? 
C40 O5 B2 122.1(9) . . ? 
C42 C41 C40 120.9(11) . . ? 
C42 C41 H28 119.5 . . ? 
C40 C41 H28 119.5 . . ? 
O6 C42 C41 122.3(12) . . ? 
O6 C42 C43 117.1(11) . . ? 
C41 C42 C43 120.5(11) . . ? 
C42 O6 B2 120.8(9) . . ? 
N4 C43 C44 104.7(11) . . ? 
N4 C43 C42 118.1(11) . . ? 
C44 C43 C42 136.4(11) . . ? 
C43 C44 C64 135.2(12) . . ? 
C43 C44 C45 107.1(11) . . ? 
C64 C44 C45 117.4(12) . . ? 
C46 C45 C44 108.3(12) . . ? 
C46 C45 C57 130.6(13) . . ? 
C44 C45 C57 121.0(12) . . ? 
N4 C46 C45 106.9(11) . . ? 
N4 C46 C48 119.7(12) . . ? 
C45 C46 C48 133.4(13) . . ? 
C46 N4 C43 112.9(11) . . ? 
C46 N4 H62 123.6 . . ? 
C43 N4 H62 123.6 . . ? 
C36 C47 H29 109.5 . . ? 
C36 C47 H30 109.5 . . ? 
H29 C47 H30 109.5 . . ? 
C36 C47 H31 109.5 . . ? 
H29 C47 H31 109.5 . . ? 
H30 C47 H31 109.5 . . ? 
C46 C48 H32 109.5 . . ? 
C46 C48 H33 109.5 . . ? 
H32 C48 H33 109.5 . . ? 
C46 C48 H34 109.5 . . ? 
H32 C48 H34 109.5 . . ? 
H33 C48 H34 109.5 . . ? 
C50 C49 C37 107.7(10) . . ? 
C50 C49 H35 110.2 . . ? 
C37 C49 H35 110.2 . . ? 
C50 C49 H36 110.2 . . ? 
C37 C49 H36 110.2 . . ? 
H35 C49 H36 108.5 . . ? 
C49 C50 C51 111.7(11) . . ? 
C49 C50 H37 109.3 . . ? 
C51 C50 H37 109.3 . . ? 
C49 C50 H38 109.3 . . ? 
C51 C50 H38 109.3 . . ? 
H37 C50 H38 107.9 . . ? 
C52 C51 C56 118.2(12) . . ? 
C52 C51 C50 119.7(12) . . ? 
C56 C51 C50 121.9(10) . . ? 
C51 C52 C53 123.2(13) . . ? 
C51 C52 H39 118.4 . . ? 
C53 C52 H39 118.4 . . ? 
C54 C53 C52 117.9(11) . . ? 
C54 C53 H40 121.1 . . ? 
C52 C53 H40 121.1 . . ? 
C53 C54 C55 121.2(11) . . ? 
C53 C54 H41 119.4 . . ? 
C55 C54 H41 119.4 . . ? 
C54 C55 C56 121.1(12) . . ? 
C54 C55 H42 119.4 . . ? 
C56 C55 H42 119.4 . . ? 
C55 C56 C51 118.2(10) . . ? 
C55 C56 C38 127.3(11) . . ? 
C51 C56 C38 113.9(11) . . ? 
C45 C57 C58 107.1(11) . . ? 
C45 C57 H43 110.3 . . ? 
C58 C57 H43 110.3 . . ? 
C45 C57 H44 110.3 . . ? 
C58 C57 H44 110.3 . . ? 
H43 C57 H44 108.5 . . ? 
C59 C58 C57 112.2(11) . . ? 
C59 C58 H45 109.2 . . ? 
C57 C58 H45 109.2 . . ? 
C59 C58 H46 109.2 . . ? 
C57 C58 H46 109.2 . . ? 
H45 C58 H46 107.9 . . ? 
C64 C59 C60 120.8(13) . . ? 
C64 C59 C58 118.8(11) . . ? 
C60 C59 C58 120.4(13) . . ? 
C61 C60 C59 121.6(15) . . ? 
C61 C60 H47 119.2 . . ? 
C59 C60 H47 119.2 . . ? 
C62 C61 C60 120.0(15) . . ? 
C62 C61 H48 120.0 . . ? 
C60 C61 H48 120.0 . . ? 
C61 C62 C63 119.6(16) . . ? 
C61 C62 H49 120.2 . . ? 
C63 C62 H49 120.2 . . ? 
C62 C63 C64 121.3(13) . . ? 
C62 C63 H50 119.3 . . ? 
C64 C63 H50 119.3 . . ? 
C59 C64 C63 116.5(11) . . ? 
C59 C64 C44 120.3(12) . . ? 
C63 C64 C44 123.2(13) . . ? 
O8 B2 O6 113.8(10) . . ? 
O8 B2 O7 107.3(9) . . ? 
O6 B2 O7 109.5(10) . . ? 
O8 B2 O5 108.2(10) . . ? 
O6 B2 O5 113.0(9) . . ? 
O7 B2 O5 104.5(10) . . ? 
C65 O7 B2 105.3(8) . . ? 
C70 O8 B2 104.0(10) . . ? 
C66 C65 O7 132.8(10) . . ? 
C66 C65 C70 118.4(11) . . ? 
O7 C65 C70 108.7(10) . . ? 
C65 C66 C67 120.3(12) . . ? 
C65 C66 H51 119.8 . . ? 
C67 C66 H51 119.8 . . ? 
C68 C67 C66 120.7(12) . . ? 
C68 C67 H52 119.7 . . ? 
C66 C67 H52 119.7 . . ? 
C67 C68 C69 122.0(11) . . ? 
C67 C68 H53 119.0 . . ? 
C69 C68 H53 119.0 . . ? 
C70 C69 C68 113.9(11) . . ? 
C70 C69 H54 123.0 . . ? 
C68 C69 H54 123.0 . . ? 
O8 C70 C69 123.1(11) . . ? 
O8 C70 C65 112.2(10) . . ? 
C69 C70 C65 124.7(12) . . ? 
Cl2 C71 Cl1 111.6(10) . . ? 
Cl2 C71 H55 109.3 . . ? 
Cl1 C71 H55 109.3 . . ? 
Cl2 C71 H56 109.3 . . ? 
Cl1 C71 H56 109.3 . . ? 
H55 C71 H56 108.0 . . ? 
Cl4 C72 Cl3 111.1(7) . . ? 
Cl4 C72 H57 109.4 . . ? 
Cl3 C72 H57 109.4 . . ? 
Cl4 C72 H58 109.4 . . ? 
Cl3 C72 H58 109.4 . . ? 
H57 C72 H58 108.0 . . ? 
 
loop_ 
 _geom_torsion_atom_site_label_1 
 _geom_torsion_atom_site_label_2 
 _geom_torsion_atom_site_label_3 
 _geom_torsion_atom_site_label_4 
 _geom_torsion 
 _geom_torsion_site_symmetry_1 
 _geom_torsion_site_symmetry_2 
 _geom_torsion_site_symmetry_3 
 _geom_torsion_site_symmetry_4 
 _geom_torsion_publ_flag 
N1 C1 C2 C3 4.8(13) . . . . ? 
C12 C1 C2 C3 -176.3(13) . . . . ? 
N1 C1 C2 C14 -175.5(12) . . . . ? 
C12 C1 C2 C14 3(2) . . . . ? 
C1 C2 C3 C4 -3.3(14) . . . . ? 
C14 C2 C3 C4 177.0(11) . . . . ? 
C1 C2 C3 C21 -179.5(11) . . . . ? 
C14 C2 C3 C21 0.7(17) . . . . ? 
C2 C3 C4 N1 0.5(14) . . . . ? 
C21 C3 C4 N1 176.1(11) . . . . ? 
C2 C3 C4 C5 -168.0(14) . . . . ? 
C21 C3 C4 C5 8(3) . . . . ? 
C2 C1 N1 C4 -4.5(13) . . . . ? 
C12 C1 N1 C4 176.5(11) . . . . ? 
C3 C4 N1 C1 2.5(13) . . . . ? 
C5 C4 N1 C1 174.0(10) . . . . ? 
C3 C4 C5 O1 -32(2) . . . . ? 
N1 C4 C5 O1 159.7(9) . . . . ? 
C3 C4 C5 C6 146.5(15) . . . . ? 
N1 C4 C5 C6 -21.4(15) . . . . ? 
C6 C5 O1 B1 10.8(15) . . . . ? 
C4 C5 O1 B1 -170.3(10) . . . . ? 
O1 C5 C6 C7 -3.5(16) . . . . ? 
C4 C5 C6 C7 177.6(10) . . . . ? 
C5 C6 C7 O2 -0.7(16) . . . . ? 
C5 C6 C7 C8 179.6(11) . . . . ? 
C6 C7 O2 B1 -2.7(16) . . . . ? 
C8 C7 O2 B1 177.0(11) . . . . ? 
O2 C7 C8 N2 -164.2(10) . . . . ? 
C6 C7 C8 N2 15.5(16) . . . . ? 
O2 C7 C8 C9 10.3(19) . . . . ? 
C6 C7 C8 C9 -170.0(12) . . . . ? 
N2 C8 C9 C10 -1.6(13) . . . . ? 
C7 C8 C9 C10 -176.4(13) . . . . ? 
N2 C8 C9 C29 -173.2(13) . . . . ? 
C7 C8 C9 C29 12(2) . . . . ? 
C8 C9 C10 C11 2.8(13) . . . . ? 
C29 C9 C10 C11 176.2(11) . . . . ? 
C8 C9 C10 C22 -178.5(11) . . . . ? 
C29 C9 C10 C22 -5.1(18) . . . . ? 
C9 C10 C11 N2 -2.9(14) . . . . ? 
C22 C10 C11 N2 178.5(12) . . . . ? 
C9 C10 C11 C13 176.5(12) . . . . ? 
C22 C10 C11 C13 -2(2) . . . . ? 
C10 C11 N2 C8 1.9(13) . . . . ? 
C13 C11 N2 C8 -177.6(11) . . . . ? 
C9 C8 N2 C11 -0.2(13) . . . . ? 
C7 C8 N2 C11 175.6(10) . . . . ? 
C1 C2 C14 C15 140.9(14) . . . . ? 
C3 C2 C14 C15 -39.4(16) . . . . ? 
C2 C14 C15 C16 54.7(16) . . . . ? 
C14 C15 C16 C17 141.0(13) . . . . ? 
C14 C15 C16 C21 -36.6(18) . . . . ? 
C21 C16 C17 C18 -1(2) . . . . ? 
C15 C16 C17 C18 -178.3(13) . . . . ? 
C16 C17 C18 C19 5(2) . . . . ? 
C17 C18 C19 C20 -6(2) . . . . ? 
C18 C19 C20 C21 3(2) . . . . ? 
C19 C20 C21 C16 1(2) . . . . ? 
C19 C20 C21 C3 178.7(12) . . . . ? 
C17 C16 C21 C20 -2.5(19) . . . . ? 
C15 C16 C21 C20 175.2(12) . . . . ? 
C17 C16 C21 C3 179.6(11) . . . . ? 
C15 C16 C21 C3 -2.7(18) . . . . ? 
C4 C3 C21 C20 29(2) . . . . ? 
C2 C3 C21 C20 -156.1(13) . . . . ? 
C4 C3 C21 C16 -153.4(14) . . . . ? 
C2 C3 C21 C16 21.7(16) . . . . ? 
C11 C10 C22 C23 149.9(12) . . . . ? 
C9 C10 C22 C23 -28.6(16) . . . . ? 
C10 C22 C23 C24 48.8(13) . . . . ? 
C22 C23 C24 C25 140.3(12) . . . . ? 
C22 C23 C24 C29 -36.5(15) . . . . ? 
C29 C24 C25 C26 -6.3(18) . . . . ? 
C23 C24 C25 C26 177.1(12) . . . . ? 
C24 C25 C26 C27 4.0(19) . . . . ? 
C25 C26 C27 C28 -1.8(19) . . . . ? 
C26 C27 C28 C29 2.0(18) . . . . ? 
C27 C28 C29 C24 -4.2(17) . . . . ? 
C27 C28 C29 C9 178.1(11) . . . . ? 
C25 C24 C29 C28 6.2(17) . . . . ? 
C23 C24 C29 C28 -176.9(10) . . . . ? 
C25 C24 C29 C9 -176.0(11) . . . . ? 
C23 C24 C29 C9 0.9(16) . . . . ? 
C8 C9 C29 C28 9(2) . . . . ? 
C10 C9 C29 C28 -161.6(12) . . . . ? 
C8 C9 C29 C24 -168.6(13) . . . . ? 
C10 C9 C29 C24 20.7(17) . . . . ? 
C7 O2 B1 O1 9.1(16) . . . . ? 
C7 O2 B1 O3 133.2(11) . . . . ? 
C7 O2 B1 O4 -114.0(12) . . . . ? 
C5 O1 B1 O2 -13.1(14) . . . . ? 
C5 O1 B1 O3 -136.7(10) . . . . ? 
C5 O1 B1 O4 109.1(12) . . . . ? 
O2 B1 O3 C30 96.4(12) . . . . ? 
O1 B1 O3 C30 -138.1(11) . . . . ? 
O4 B1 O3 C30 -19.7(13) . . . . ? 
O2 B1 O4 C35 -98.8(10) . . . . ? 
O1 B1 O4 C35 136.5(10) . . . . ? 
O3 B1 O4 C35 18.0(13) . . . . ? 
B1 O3 C30 C31 -165.4(14) . . . . ? 
B1 O3 C30 C35 13.8(14) . . . . ? 
O3 C30 C31 C32 -178.7(13) . . . . ? 
C35 C30 C31 C32 2.1(18) . . . . ? 
C30 C31 C32 C33 -2(2) . . . . ? 
C31 C32 C33 C34 1(2) . . . . ? 
C32 C33 C34 C35 0.3(19) . . . . ? 
C33 C34 C35 O4 -178.6(11) . . . . ? 
C33 C34 C35 C30 -0.4(19) . . . . ? 
B1 O4 C35 C34 167.7(12) . . . . ? 
B1 O4 C35 C30 -10.8(13) . . . . ? 
O3 C30 C35 C34 179.8(11) . . . . ? 
C31 C30 C35 C34 -0.8(18) . . . . ? 
O3 C30 C35 O4 -1.7(14) . . . . ? 
C31 C30 C35 O4 177.7(10) . . . . ? 
N3 C36 C37 C38 1.1(14) . . . . ? 
C47 C36 C37 C38 -179.5(13) . . . . ? 
N3 C36 C37 C49 -176.8(11) . . . . ? 
C47 C36 C37 C49 3(2) . . . . ? 
C36 C37 C38 C39 0.8(13) . . . . ? 
C49 C37 C38 C39 178.8(11) . . . . ? 
C36 C37 C38 C56 -179.0(10) . . . . ? 
C49 C37 C38 C56 -1.0(17) . . . . ? 
C37 C38 C39 C40 177.2(14) . . . . ? 
C56 C38 C39 C40 -3(2) . . . . ? 
C37 C38 C39 N3 -2.3(12) . . . . ? 
C56 C38 C39 N3 177.4(11) . . . . ? 
C37 C36 N3 C39 -2.7(14) . . . . ? 
C47 C36 N3 C39 177.8(11) . . . . ? 
C40 C39 N3 C36 -176.5(12) . . . . ? 
C38 C39 N3 C36 3.1(13) . . . . ? 
N3 C39 C40 O5 164.6(10) . . . . ? 
C38 C39 C40 O5 -15(2) . . . . ? 
N3 C39 C40 C41 -12.0(17) . . . . ? 
C38 C39 C40 C41 168.5(13) . . . . ? 
C39 C40 O5 B2 -178.3(10) . . . . ? 
C41 C40 O5 B2 -1.6(15) . . . . ? 
O5 C40 C41 C42 4.0(16) . . . . ? 
C39 C40 C41 C42 -179.4(12) . . . . ? 
C40 C41 C42 O6 1.0(17) . . . . ? 
C40 C41 C42 C43 -178.2(10) . . . . ? 
C41 C42 O6 B2 -8.4(17) . . . . ? 
C43 C42 O6 B2 170.9(10) . . . . ? 
O6 C42 C43 N4 -160.1(10) . . . . ? 
C41 C42 C43 N4 19.2(16) . . . . ? 
O6 C42 C43 C44 32(2) . . . . ? 
C41 C42 C43 C44 -148.7(14) . . . . ? 
N4 C43 C44 C64 -173.5(13) . . . . ? 
C42 C43 C44 C64 -4(2) . . . . ? 
N4 C43 C44 C45 -0.3(12) . . . . ? 
C42 C43 C44 C45 168.7(13) . . . . ? 
C43 C44 C45 C46 2.4(13) . . . . ? 
C64 C44 C45 C46 177.0(11) . . . . ? 
C43 C44 C45 C57 -173.8(11) . . . . ? 
C64 C44 C45 C57 0.8(17) . . . . ? 
C44 C45 C46 N4 -3.6(13) . . . . ? 
C57 C45 C46 N4 172.1(13) . . . . ? 
C44 C45 C46 C48 175.4(13) . . . . ? 
C57 C45 C46 C48 -9(2) . . . . ? 
C45 C46 N4 C43 3.5(13) . . . . ? 
C48 C46 N4 C43 -175.6(11) . . . . ? 
C44 C43 N4 C46 -2.0(13) . . . . ? 
C42 C43 N4 C46 -173.4(11) . . . . ? 
C36 C37 C49 C50 -150.1(12) . . . . ? 
C38 C37 C49 C50 32.3(15) . . . . ? 
C37 C49 C50 C51 -49.5(13) . . . . ? 
C49 C50 C51 C52 -142.0(12) . . . . ? 
C49 C50 C51 C56 43.0(15) . . . . ? 
C56 C51 C52 C53 -2.0(19) . . . . ? 
C50 C51 C52 C53 -177.2(12) . . . . ? 
C51 C52 C53 C54 2.2(19) . . . . ? 
C52 C53 C54 C55 -3.5(18) . . . . ? 
C53 C54 C55 C56 4.7(17) . . . . ? 
C54 C55 C56 C51 -4.3(15) . . . . ? 
C54 C55 C56 C38 -174.6(11) . . . . ? 
C52 C51 C56 C55 2.9(16) . . . . ? 
C50 C51 C56 C55 178.0(10) . . . . ? 
C52 C51 C56 C38 174.5(11) . . . . ? 
C50 C51 C56 C38 -10.4(15) . . . . ? 
C37 C38 C56 C55 159.3(11) . . . . ? 
C39 C38 C56 C55 -20.4(18) . . . . ? 
C37 C38 C56 C51 -11.3(15) . . . . ? 
C39 C38 C56 C51 169.0(12) . . . . ? 
C46 C45 C57 C58 -140.1(13) . . . . ? 
C44 C45 C57 C58 35.1(16) . . . . ? 
C45 C57 C58 C59 -53.4(14) . . . . ? 
C57 C58 C59 C64 38.6(16) . . . . ? 
C57 C58 C59 C60 -142.6(13) . . . . ? 
C64 C59 C60 C61 -3(2) . . . . ? 
C58 C59 C60 C61 177.9(13) . . . . ? 
C59 C60 C61 C62 1(2) . . . . ? 
C60 C61 C62 C63 1(2) . . . . ? 
C61 C62 C63 C64 1(2) . . . . ? 
C60 C59 C64 C63 4.6(19) . . . . ? 
C58 C59 C64 C63 -176.6(10) . . . . ? 
C60 C59 C64 C44 -178.6(12) . . . . ? 
C58 C59 C64 C44 0.1(18) . . . . ? 
C62 C63 C64 C59 -3.4(18) . . . . ? 
C62 C63 C64 C44 179.9(11) . . . . ? 
C43 C44 C64 C59 151.6(14) . . . . ? 
C45 C44 C64 C59 -21.0(17) . . . . ? 
C43 C44 C64 C63 -32(2) . . . . ? 
C45 C44 C64 C63 155.5(11) . . . . ? 
C42 O6 B2 O8 133.8(10) . . . . ? 
C42 O6 B2 O7 -106.2(11) . . . . ? 
C42 O6 B2 O5 9.9(15) . . . . ? 
C40 O5 B2 O8 -132.0(10) . . . . ? 
C40 O5 B2 O6 -5.1(15) . . . . ? 
C40 O5 B2 O7 113.9(11) . . . . ? 
O8 B2 O7 C65 -14.9(13) . . . . ? 
O6 B2 O7 C65 -138.8(9) . . . . ? 
O5 B2 O7 C65 99.9(9) . . . . ? 
O6 B2 O8 C70 136.9(10) . . . . ? 
O7 B2 O8 C70 15.6(12) . . . . ? 
O5 B2 O8 C70 -96.7(11) . . . . ? 
B2 O7 C65 C66 -168.1(14) . . . . ? 
B2 O7 C65 C70 7.9(13) . . . . ? 
O7 C65 C66 C67 175.7(12) . . . . ? 
C70 C65 C66 C67 0(2) . . . . ? 
C65 C66 C67 C68 -1(2) . . . . ? 
C66 C67 C68 C69 2(2) . . . . ? 
C67 C68 C69 C70 -2.1(19) . . . . ? 
B2 O8 C70 C69 167.2(12) . . . . ? 
B2 O8 C70 C65 -11.2(13) . . . . ? 
C68 C69 C70 O8 -177.4(11) . . . . ? 
C68 C69 C70 C65 0.9(18) . . . . ? 
C66 C65 C70 O8 178.6(11) . . . . ? 
O7 C65 C70 O8 1.9(14) . . . . ? 
C66 C65 C70 C69 0.2(19) . . . . ? 
O7 C65 C70 C69 -176.5(11) . . . . ? 
 
_diffrn_measured_fraction_theta_max    0.980 
_diffrn_reflns_theta_full              26.00 
_diffrn_measured_fraction_theta_full   0.980 
_refine_diff_density_max    0.280 
_refine_diff_density_min   -0.468 
_refine_diff_density_rms    0.064 


#==============================================================================

#     End of CIF

#==============================================================================


data_0323ma 
 
_audit_creation_method            SHELXL-97 
_chemical_name_systematic 
; 
 ? 
; 
_chemical_name_common             ? 
_chemical_melting_point           ? 
_chemical_formula_moiety        
 'C35 H29 B N2 O4, C16 H36 N, Cl' 
_chemical_formula_sum 
 'C51 H65 B Cl N3 O4' 
_chemical_formula_weight         830.32
 
loop_ 
 _atom_type_symbol 
 _atom_type_description 
 _atom_type_scat_dispersion_real 
 _atom_type_scat_dispersion_imag 
 _atom_type_scat_source 
 'C'  'C'   0.0181   0.0091 
 'International Tables Vol C Tables 4.2.6.8 and 6.1.1.4' 
 'H'  'H'   0.0000   0.0000 
 'International Tables Vol C Tables 4.2.6.8 and 6.1.1.4' 
 'B'  'B'   0.0090   0.0039 
 'International Tables Vol C Tables 4.2.6.8 and 6.1.1.4' 
 'Cl'  'Cl'   0.3639   0.7018 
 'International Tables Vol C Tables 4.2.6.8 and 6.1.1.4' 
 'N'  'N'   0.0311   0.0180 
 'International Tables Vol C Tables 4.2.6.8 and 6.1.1.4' 
 'O'  'O'   0.0492   0.0322 
 'International Tables Vol C Tables 4.2.6.8 and 6.1.1.4' 
 
_symmetry_cell_setting            monoclinic 
_symmetry_space_group_name_H-M    'P21'
_symmetry_space_group_name_Hall       'P 2yb'
_symmetry_Int_Tables_number            4
loop_ 
 _symmetry_equiv_pos_as_xyz 
 'x, y, z' 
 '-x, y+1/2, -z' 
 
_cell_length_a                    14.121 
_cell_length_b                    9.324 
_cell_length_c                    18.497 
_cell_angle_alpha                 90.00 
_cell_angle_beta                  99.18 
_cell_angle_gamma                 90.00 
_cell_volume                      2404.1 
_cell_formula_units_Z             2 
_cell_measurement_temperature     93(2) 
_cell_measurement_reflns_used     ? 
_cell_measurement_theta_min       ? 
_cell_measurement_theta_max       ? 
 
_exptl_crystal_description        prism 
_exptl_crystal_colour             red 
_exptl_crystal_size_max           0.40 
_exptl_crystal_size_mid           0.20 
_exptl_crystal_size_min           0.05 
_exptl_crystal_density_meas       ? 
_exptl_crystal_density_diffrn     1.147 
_exptl_crystal_density_method     'not measured' 
_exptl_crystal_F_000              892 
_exptl_absorpt_coefficient_mu     1.052 
_exptl_absorpt_correction_type    none 
_exptl_absorpt_correction_T_min   ? 
_exptl_absorpt_correction_T_max   ? 
_exptl_absorpt_process_details    ? 
 
_exptl_special_details 
; 
 ? 
; 
 
_diffrn_ambient_temperature       93(2) 
_diffrn_radiation_wavelength      1.54187 
_diffrn_radiation_type            CuK�a 
_diffrn_radiation_source          'fine-focus sealed tube' 
_diffrn_radiation_monochromator   graphite 
_diffrn_measurement_device_type  'Rigaku RAXIS-RAPID'   
_diffrn_measurement_method         �w  
_diffrn_detector_area_resol_mean  10
_diffrn_standards_number          ? 
_diffrn_standards_interval_count  ? 
_diffrn_standards_interval_time   ? 
_diffrn_standards_decay_%         ? 
_diffrn_reflns_number             24677 
_diffrn_reflns_av_R_equivalents   0.0828 
_diffrn_reflns_av_sigmaI/netI     0.1181 
_diffrn_reflns_limit_h_min        -17 
_diffrn_reflns_limit_h_max        16 
_diffrn_reflns_limit_k_min        -10 
_diffrn_reflns_limit_k_max        11 
_diffrn_reflns_limit_l_min        -22 
_diffrn_reflns_limit_l_max        22 
_diffrn_reflns_theta_min          3.17 
_diffrn_reflns_theta_max          68.25 
_reflns_number_total              4685
_reflns_number_gt                 3665 
_reflns_threshold_expression      >2sigma(I) 
 
_computing_data_collection        ? 
_computing_cell_refinement        ? 
_computing_data_reduction         ? 
_computing_structure_solution     'SHELXS-97 (Sheldrick, 1990)' 
_computing_structure_refinement   'SHELXL-97 (Sheldrick, 1997)' 
_computing_molecular_graphics     ? 
_computing_publication_material   ? 
 
_refine_special_details 
; 
 Refinement of F^2^ against ALL reflections.  The weighted R-factor wR and 
 goodness of fit S are based on F^2^, conventional R-factors R are based 
 on F, with F set to zero for negative F^2^. The threshold expression of 
 F^2^ > 2sigma(F^2^) is used only for calculating R-factors(gt) etc. and is 
 not relevant to the choice of reflections for refinement.  R-factors based 
 on F^2^ are statistically about twice as large as those based on F, and R- 
 factors based on ALL data will be even larger. 
; 
 
_refine_ls_structure_factor_coef  Fsqd  
_refine_ls_matrix_type            full 
_refine_ls_weighting_scheme       calc  
_refine_ls_weighting_details 
 'calc w=1/[�s^2^(Fo^2^)+(0.1000P)^2^+0.0000P] where P=(Fo^2^+2Fc^2^)/3' 
_atom_sites_solution_primary      direct 
_atom_sites_solution_secondary    difmap 
_atom_sites_solution_hydrogens    geom 
_refine_ls_hydrogen_treatment     constr 
_refine_ls_extinction_method      none 
_refine_ls_extinction_coef        ? 
_refine_ls_abs_structure_details 
 'Flack H D (1983), Acta Cryst. A39, 876-881' 
_refine_ls_abs_structure_Flack    0.07(5) 
_refine_ls_number_reflns          8384 
_refine_ls_number_parameters      547 
_refine_ls_number_restraints      1 
_refine_ls_R_factor_all           0.1754 
_refine_ls_R_factor_gt            0.0971 
_refine_ls_wR_factor_ref          0.2655 
_refine_ls_wR_factor_gt           0.2180 
_refine_ls_goodness_of_fit_ref    1.129 
_refine_ls_restrained_S_all       1.129 
_refine_ls_shift/su_max           0.047 
_refine_ls_shift/su_mean          0.004 
 
loop_ 
 _atom_site_label 
 _atom_site_type_symbol 
 _atom_site_fract_x 
 _atom_site_fract_y 
 _atom_site_fract_z 
 _atom_site_U_iso_or_equiv 
 _atom_site_adp_type 
 _atom_site_occupancy 
 _atom_site_symmetry_multiplicity 
 _atom_site_calc_flag 
 _atom_site_refinement_flags 
 _atom_site_disorder_assembly 
 _atom_site_disorder_group 
O1 O 0.69210(19) 0.8167(3) 0.20299(15) 0.0603(9) Uani 1 1 d . . . 
O2 O 0.84081(19) 0.6961(3) 0.25866(14) 0.0554(8) Uani 1 1 d . . . 
B1 B 0.7915(3) 0.7701(6) 0.1928(3) 0.0518(14) Uani 1 1 d . . . 
O3 O 0.84699(19) 0.8963(3) 0.17632(15) 0.0566(8) Uani 1 1 d . . . 
O4 O 0.78410(19) 0.6750(3) 0.12928(15) 0.0569(8) Uani 1 1 d . . . 
N1 N 0.5317(3) 0.8329(4) 0.3349(2) 0.0703(12) Uani 1 1 d . . . 
H1 H 0.5632 0.7912 0.3728 0.084 Uiso 1 1 calc R . . 
N2 N 0.8296(3) 0.5991(4) 0.44447(19) 0.0667(12) Uani 1 1 d . . . 
H2 H 0.7714 0.6164 0.4503 0.080 Uiso 1 1 calc R . . 
C1 C 0.4396(4) 0.8850(6) 0.3301(3) 0.0890(18) Uani 1 1 d . . . 
C2 C 0.4139(4) 0.9419(6) 0.2598(3) 0.0781(17) Uani 1 1 d . . . 
C3 C 0.4926(3) 0.9243(5) 0.2207(3) 0.0664(15) Uani 1 1 d . . . 
C4 C 0.5668(3) 0.8574(5) 0.2692(3) 0.0631(14) Uani 1 1 d . . . 
C5 C 0.6611(3) 0.8109(5) 0.2656(2) 0.0601(14) Uani 1 1 d . . . 
C6 C 0.7216(3) 0.7638(5) 0.3281(2) 0.0620(14) Uani 1 1 d . . . 
H3 H 0.7028 0.7736 0.3738 0.074 Uiso 1 1 calc R . . 
C7 C 0.8090(3) 0.7029(5) 0.3227(2) 0.0547(12) Uani 1 1 d . . . 
C8 C 0.8697(3) 0.6359(5) 0.3830(2) 0.0571(13) Uani 1 1 d . . . 
C9 C 0.9649(3) 0.5868(5) 0.3958(2) 0.0628(14) Uani 1 1 d . . . 
C10 C 0.9807(4) 0.5230(5) 0.4664(3) 0.0699(15) Uani 1 1 d . . . 
C11 C 0.8957(4) 0.5323(5) 0.4934(3) 0.0713(16) Uani 1 1 d . . . 
C12 C 0.3211(3) 1.0173(6) 0.2263(3) 0.0842(19) Uani 1 1 d . . . 
H4 H 0.2776 0.9497 0.1983 0.101 Uiso 1 1 calc R . . 
H5 H 0.2896 1.0578 0.2645 0.101 Uiso 1 1 calc R . . 
C13 C 0.3478(4) 1.1353(6) 0.1767(3) 0.095(2) Uani 1 1 d . . . 
H6 H 0.3836 1.2089 0.2065 0.114 Uiso 1 1 calc R . . 
H7 H 0.2896 1.1788 0.1510 0.114 Uiso 1 1 calc R . . 
C14 C 0.4076(3) 1.0810(5) 0.1210(3) 0.0780(17) Uani 1 1 d . . . 
C15 C 0.3915(4) 1.1224(6) 0.0480(3) 0.094(2) Uani 1 1 d . . . 
H8 H 0.3419 1.1863 0.0326 0.113 Uiso 1 1 calc R . . 
C16 C 0.4453(4) 1.0737(6) -0.0023(3) 0.0873(19) Uani 1 1 d . . . 
H9 H 0.4355 1.1086 -0.0500 0.105 Uiso 1 1 calc R . . 
C17 C 0.5148(4) 0.9706(6) 0.0200(3) 0.0832(19) Uani 1 1 d . . . 
H10 H 0.5511 0.9346 -0.0137 0.100 Uiso 1 1 calc R . . 
C18 C 0.5311(3) 0.9200(5) 0.0917(2) 0.0587(14) Uani 1 1 d . . . 
H11 H 0.5771 0.8492 0.1048 0.070 Uiso 1 1 calc R . . 
C19 C 0.4802(3) 0.9731(6) 0.1438(3) 0.0731(17) Uani 1 1 d . . . 
C20 C 0.3858(4) 0.8694(7) 0.3917(3) 0.096(2) Uani 1 1 d . . . 
H12 H 0.3252 0.8240 0.3747 0.143 Uiso 1 1 calc R . . 
H13 H 0.3749 0.9623 0.4112 0.143 Uiso 1 1 calc R . . 
H14 H 0.4220 0.8116 0.4292 0.143 Uiso 1 1 calc R . . 
C21 C 1.0723(4) 0.4595(6) 0.4972(3) 0.0823(18) Uani 1 1 d . . . 
H15 H 1.0619 0.3810 0.5294 0.099 Uiso 1 1 calc R . . 
H16 H 1.1120 0.5307 0.5258 0.099 Uiso 1 1 calc R . . 
C22 C 1.1239(4) 0.4035(6) 0.4359(3) 0.092(2) Uani 1 1 d . . . 
H17 H 1.1889 0.3758 0.4563 0.110 Uiso 1 1 calc R . . 
H18 H 1.0909 0.3194 0.4137 0.110 Uiso 1 1 calc R . . 
C23 C 1.1264(4) 0.5150(5) 0.3796(3) 0.0771(17) Uani 1 1 d . . . 
C24 C 1.2069(4) 0.5257(7) 0.3413(3) 0.094(2) Uani 1 1 d . . . 
H19 H 1.2586 0.4636 0.3527 0.113 Uiso 1 1 calc R . . 
C25 C 1.2074(4) 0.6294(7) 0.2870(3) 0.093(2) Uani 1 1 d . . . 
H20 H 1.2612 0.6389 0.2642 0.112 Uiso 1 1 calc R . . 
C26 C 1.1292(3) 0.7186(6) 0.2664(3) 0.0759(17) Uani 1 1 d . . . 
H21 H 1.1305 0.7863 0.2296 0.091 Uiso 1 1 calc R . . 
C27 C 1.0505(3) 0.7071(6) 0.2999(2) 0.0709(16) Uani 1 1 d . . . 
H22 H 0.9983 0.7676 0.2864 0.085 Uiso 1 1 calc R . . 
C28 C 1.0481(3) 0.6040(5) 0.3547(3) 0.0690(15) Uani 1 1 d . . . 
C29 C 0.8700(4) 0.4826(6) 0.5661(3) 0.0862(19) Uani 1 1 d . . . 
H23 H 0.8836 0.3821 0.5724 0.129 Uiso 1 1 calc R . . 
H24 H 0.8030 0.4991 0.5666 0.129 Uiso 1 1 calc R . . 
H25 H 0.9073 0.5352 0.6053 0.129 Uiso 1 1 calc R . . 
C30 C 0.8753(3) 0.8699(5) 0.1095(2) 0.0561(13) Uani 1 1 d . . . 
C31 C 0.9304(3) 0.9534(5) 0.0721(3) 0.0644(15) Uani 1 1 d . . . 
H26 H 0.9567 1.0397 0.0909 0.077 Uiso 1 1 calc R . . 
C32 C 0.9452(3) 0.9013(6) 0.0031(3) 0.0687(15) Uani 1 1 d . . . 
H27 H 0.9797 0.9572 -0.0253 0.082 Uiso 1 1 calc R . . 
C33 C 0.9102(3) 0.7703(6) -0.0237(3) 0.0731(16) Uani 1 1 d . . . 
H28 H 0.9233 0.7387 -0.0687 0.088 Uiso 1 1 calc R . . 
C34 C 0.8561(3) 0.6849(5) 0.0154(2) 0.0609(14) Uani 1 1 d . . . 
H29 H 0.8326 0.5963 -0.0021 0.073 Uiso 1 1 calc R . . 
C35 C 0.8385(3) 0.7384(5) 0.0826(2) 0.0544(13) Uani 1 1 d . . . 
Cl1 Cl 0.62359(12) 0.6794(3) 0.48428(9) 0.1554(8) Uani 1 1 d . . . 
N3 N 1.2639(2) 0.7894(4) -0.2085(2) 0.0561(11) Uani 1 1 d . . . 
C36 C 1.1617(3) 0.8526(5) -0.2276(3) 0.0629(15) Uani 1 1 d . . . 
H30 H 1.1576 0.9068 -0.2727 0.076 Uiso 1 1 calc R . . 
H31 H 1.1513 0.9189 -0.1892 0.076 Uiso 1 1 calc R . . 
C37 C 1.0804(3) 0.7381(5) -0.2368(3) 0.0651(14) Uani 1 1 d . . . 
H32 H 1.0703 0.7007 -0.2863 0.078 Uiso 1 1 calc R . . 
H33 H 1.0977 0.6591 -0.2031 0.078 Uiso 1 1 calc R . . 
C38 C 0.9886(3) 0.8113(6) -0.2204(3) 0.0719(16) Uani 1 1 d . . . 
H34 H 0.9761 0.8965 -0.2505 0.086 Uiso 1 1 calc R . . 
H35 H 0.9976 0.8406 -0.1695 0.086 Uiso 1 1 calc R . . 
C39 C 0.9018(3) 0.7087(6) -0.2360(3) 0.0779(17) Uani 1 1 d . . . 
H36 H 0.8869 0.6910 -0.2877 0.117 Uiso 1 1 calc R . . 
H37 H 0.8474 0.7516 -0.2193 0.117 Uiso 1 1 calc R . . 
H38 H 0.9171 0.6197 -0.2107 0.117 Uiso 1 1 calc R . . 
C40 C 1.2820(3) 0.6856(5) -0.2672(2) 0.0648(14) Uani 1 1 d . . . 
H39 H 1.2357 0.6083 -0.2692 0.078 Uiso 1 1 calc R . . 
H40 H 1.3452 0.6442 -0.2530 0.078 Uiso 1 1 calc R . . 
C41 C 1.2762(4) 0.7497(6) -0.3455(3) 0.0873(19) Uani 1 1 d . . . 
H41 H 1.2105 0.7765 -0.3644 0.105 Uiso 1 1 calc R . . 
H42 H 1.3158 0.8351 -0.3437 0.105 Uiso 1 1 calc R . . 
C42 C 1.3112(4) 0.6380(6) -0.3956(3) 0.0892(19) Uani 1 1 d . . . 
H43 H 1.3762 0.6104 -0.3752 0.107 Uiso 1 1 calc R . . 
H44 H 1.2711 0.5532 -0.3966 0.107 Uiso 1 1 calc R . . 
C43 C 1.3098(6) 0.6869(8) -0.4694(4) 0.143(3) Uani 1 1 d . . . 
H45 H 1.2459 0.7161 -0.4898 0.215 Uiso 1 1 calc R . . 
H46 H 1.3298 0.6105 -0.4983 0.215 Uiso 1 1 calc R . . 
H47 H 1.3527 0.7667 -0.4694 0.215 Uiso 1 1 calc R . . 
C44 C 1.3317(3) 0.9174(5) -0.2051(3) 0.0597(14) Uani 1 1 d . . . 
H48 H 1.3183 0.9683 -0.2514 0.072 Uiso 1 1 calc R . . 
H49 H 1.3173 0.9821 -0.1673 0.072 Uiso 1 1 calc R . . 
C45 C 1.4364(3) 0.8837(5) -0.1903(3) 0.0697(15) Uani 1 1 d . . . 
H50 H 1.4515 0.8107 -0.2241 0.084 Uiso 1 1 calc R . . 
H51 H 1.4539 0.8475 -0.1408 0.084 Uiso 1 1 calc R . . 
C46 C 1.4924(3) 1.0214(6) -0.1999(4) 0.091(2) Uani 1 1 d . . . 
H52 H 1.4758 1.0499 -0.2508 0.109 Uiso 1 1 calc R . . 
H53 H 1.4677 1.0952 -0.1710 0.109 Uiso 1 1 calc R . . 
C47 C 1.5961(4) 1.0253(8) -0.1819(4) 0.126(3) Uani 1 1 d . . . 
H54 H 1.6146 1.0280 -0.1297 0.189 Uiso 1 1 calc R . . 
H55 H 1.6199 1.1093 -0.2031 0.189 Uiso 1 1 calc R . . 
H56 H 1.6226 0.9412 -0.2010 0.189 Uiso 1 1 calc R . . 
C48 C 1.2773(3) 0.7088(5) -0.1361(3) 0.0650(14) Uani 1 1 d . . . 
H57 H 1.2432 0.6184 -0.1435 0.078 Uiso 1 1 calc R . . 
H58 H 1.3449 0.6871 -0.1222 0.078 Uiso 1 1 calc R . . 
C49 C 1.2433(3) 0.7875(5) -0.0736(3) 0.0670(15) Uani 1 1 d . . . 
H59 H 1.1743 0.8001 -0.0840 0.080 Uiso 1 1 calc R . . 
H60 H 1.2728 0.8817 -0.0679 0.080 Uiso 1 1 calc R . . 
C50 C 1.2707(3) 0.7000(6) -0.0015(3) 0.0737(16) Uani 1 1 d . . . 
H61 H 1.2518 0.6007 -0.0102 0.088 Uiso 1 1 calc R . . 
H62 H 1.3397 0.7029 0.0137 0.088 Uiso 1 1 calc R . . 
C51 C 1.2211(4) 0.7614(6) 0.0590(3) 0.0885(19) Uani 1 1 d . . . 
H63 H 1.2500 0.8516 0.0749 0.133 Uiso 1 1 calc R . . 
H64 H 1.2280 0.6958 0.0995 0.133 Uiso 1 1 calc R . . 
H65 H 1.1543 0.7755 0.0407 0.133 Uiso 1 1 calc R . . 
 
loop_ 
 _atom_site_aniso_label 
 _atom_site_aniso_U_11 
 _atom_site_aniso_U_22 
 _atom_site_aniso_U_33 
 _atom_site_aniso_U_23 
 _atom_site_aniso_U_13 
 _atom_site_aniso_U_12 
O1 0.0618(17) 0.0589(19) 0.0587(18) 0.0039(16) 0.0047(15) 0.0114(15) 
O2 0.0640(16) 0.0508(17) 0.0503(16) 0.0074(15) 0.0057(13) 0.0062(15) 
B1 0.054(3) 0.053(3) 0.047(3) 0.008(3) 0.004(2) 0.000(3) 
O3 0.0733(17) 0.0386(16) 0.0573(18) 0.0058(15) 0.0087(14) -0.0043(15) 
O4 0.0672(17) 0.0438(17) 0.0586(17) -0.0060(15) 0.0069(14) -0.0058(15) 
N1 0.073(2) 0.062(3) 0.078(3) -0.007(2) 0.019(2) -0.001(2) 
N2 0.084(2) 0.062(3) 0.052(2) 0.003(2) 0.0060(19) -0.007(2) 
C1 0.088(3) 0.066(3) 0.121(4) -0.030(3) 0.041(3) -0.012(3) 
C2 0.077(3) 0.077(4) 0.081(4) -0.018(3) 0.015(3) -0.009(3) 
C3 0.063(3) 0.054(3) 0.080(3) -0.009(3) 0.005(3) -0.004(3) 
C4 0.066(3) 0.045(3) 0.076(3) -0.007(2) 0.005(3) -0.003(2) 
C5 0.065(3) 0.061(3) 0.054(3) 0.002(2) 0.008(2) -0.003(2) 
C6 0.073(3) 0.062(3) 0.052(3) 0.004(3) 0.010(2) 0.007(3) 
C7 0.065(2) 0.047(3) 0.051(2) -0.001(2) 0.007(2) -0.004(2) 
C8 0.070(3) 0.049(3) 0.047(3) -0.004(2) -0.008(2) 0.000(2) 
C9 0.072(3) 0.058(3) 0.054(3) 0.017(2) -0.002(2) -0.005(3) 
C10 0.086(3) 0.057(3) 0.062(3) 0.010(3) -0.003(3) 0.001(3) 
C11 0.096(4) 0.047(3) 0.065(3) 0.010(3) -0.004(3) -0.007(3) 
C12 0.062(3) 0.071(4) 0.118(4) -0.004(3) 0.009(3) -0.006(3) 
C13 0.073(3) 0.052(3) 0.160(5) -0.012(4) 0.016(4) 0.001(3) 
C14 0.058(3) 0.044(3) 0.129(5) -0.015(3) 0.007(3) -0.014(2) 
C15 0.070(3) 0.087(4) 0.113(4) 0.040(4) -0.023(3) -0.021(3) 
C16 0.071(3) 0.061(3) 0.121(5) 0.030(3) -0.011(3) -0.012(3) 
C17 0.081(3) 0.070(4) 0.087(4) 0.004(3) -0.022(3) -0.012(3) 
C18 0.058(2) 0.058(3) 0.056(3) 0.010(2) -0.001(2) -0.003(2) 
C19 0.058(3) 0.063(3) 0.089(4) 0.006(3) -0.015(3) -0.001(3) 
C20 0.086(3) 0.105(5) 0.105(4) -0.010(4) 0.045(3) 0.006(3) 
C21 0.084(3) 0.073(4) 0.082(4) 0.006(3) -0.008(3) 0.005(3) 
C22 0.096(4) 0.071(4) 0.100(4) 0.020(3) -0.014(3) 0.020(3) 
C23 0.085(3) 0.046(3) 0.090(4) 0.003(3) -0.016(3) 0.005(3) 
C24 0.081(3) 0.117(5) 0.081(4) 0.010(4) 0.002(3) 0.032(4) 
C25 0.088(4) 0.119(5) 0.073(4) -0.004(4) 0.013(3) -0.005(4) 
C26 0.076(3) 0.085(4) 0.064(3) -0.001(3) 0.001(3) -0.002(3) 
C27 0.064(3) 0.075(3) 0.066(3) -0.001(3) -0.015(2) -0.004(3) 
C28 0.072(3) 0.056(3) 0.075(3) 0.009(3) -0.002(3) 0.005(3) 
C29 0.115(4) 0.087(4) 0.052(3) 0.012(3) -0.001(3) -0.028(3) 
C30 0.054(2) 0.056(3) 0.053(3) -0.010(2) -0.008(2) -0.004(2) 
C31 0.080(3) 0.045(3) 0.067(3) 0.010(2) 0.009(3) -0.005(3) 
C32 0.079(3) 0.067(3) 0.064(3) 0.020(3) 0.021(2) -0.007(3) 
C33 0.080(3) 0.077(4) 0.065(3) -0.008(3) 0.020(3) 0.005(3) 
C34 0.069(3) 0.052(3) 0.062(3) 0.004(3) 0.011(2) 0.007(2) 
C35 0.056(2) 0.051(3) 0.054(3) 0.008(2) 0.002(2) 0.005(2) 
Cl1 0.1036(11) 0.247(2) 0.1206(12) 0.0875(14) 0.0331(9) 0.0137(14) 
N3 0.059(2) 0.044(2) 0.063(2) 0.0009(18) 0.0010(18) -0.0006(18) 
C36 0.055(3) 0.051(3) 0.077(3) 0.003(3) -0.007(2) 0.001(2) 
C37 0.065(3) 0.056(3) 0.073(3) 0.008(3) 0.008(2) -0.003(3) 
C38 0.065(3) 0.073(3) 0.076(3) -0.010(3) 0.005(3) -0.003(3) 
C39 0.064(3) 0.094(4) 0.072(3) -0.005(3) -0.001(2) -0.025(3) 
C40 0.077(3) 0.043(3) 0.071(3) 0.001(3) 0.002(2) 0.001(3) 
C41 0.115(4) 0.070(4) 0.077(4) 0.011(3) 0.017(3) 0.008(3) 
C42 0.118(4) 0.084(4) 0.064(3) 0.005(3) 0.011(3) -0.007(4) 
C43 0.228(8) 0.095(5) 0.099(5) 0.012(5) 0.003(5) -0.011(6) 
C44 0.059(3) 0.035(2) 0.080(3) 0.006(2) -0.002(2) -0.007(2) 
C45 0.069(3) 0.051(3) 0.085(4) -0.004(3) -0.001(3) -0.006(3) 
C46 0.064(3) 0.071(4) 0.133(5) 0.006(4) 0.004(3) -0.026(3) 
C47 0.089(4) 0.096(5) 0.184(7) -0.010(5) -0.003(4) 0.004(4) 
C48 0.062(3) 0.045(3) 0.086(3) 0.004(3) 0.005(2) -0.003(2) 
C49 0.068(3) 0.052(3) 0.077(3) 0.008(3) -0.002(3) -0.001(3) 
C50 0.060(3) 0.076(4) 0.081(3) 0.010(3) -0.004(3) -0.005(3) 
C51 0.114(4) 0.075(4) 0.076(4) 0.009(3) 0.013(3) 0.010(3) 
 
_geom_special_details 
; 
 All esds (except the esd in the dihedral angle between two l.s. planes) 
 are estimated using the full covariance matrix.  The cell esds are taken 
 into account individually in the estimation of esds in distances, angles 
 and torsion angles; correlations between esds in cell parameters are only 
 used when they are defined by crystal symmetry.  An approximate (isotropic) 
 treatment of cell esds is used for estimating esds involving l.s. planes. 
; 
 
loop_ 
 _geom_bond_atom_site_label_1 
 _geom_bond_atom_site_label_2 
 _geom_bond_distance 
 _geom_bond_site_symmetry_2 
 _geom_bond_publ_flag 
O1 C5 1.303(5) . ? 
O1 B1 1.510(6) . ? 
O2 C7 1.334(5) . ? 
O2 B1 1.474(5) . ? 
B1 O4 1.462(6) . ? 
B1 O3 1.472(6) . ? 
O3 C30 1.380(5) . ? 
O4 C35 1.377(5) . ? 
N1 C1 1.378(6) . ? 
N1 C4 1.403(6) . ? 
N1 H1 0.8600 . ? 
N2 C11 1.345(6) . ? 
N2 C8 1.392(6) . ? 
N2 H2 0.8600 . ? 
C1 C2 1.398(8) . ? 
C1 C20 1.475(7) . ? 
C2 C3 1.428(7) . ? 
C2 C12 1.529(7) . ? 
C3 C4 1.411(6) . ? 
C3 C19 1.478(7) . ? 
C4 C5 1.412(6) . ? 
C5 C6 1.394(6) . ? 
C6 C7 1.376(6) . ? 
C6 H3 0.9300 . ? 
C7 C8 1.437(6) . ? 
C8 C9 1.404(6) . ? 
C9 C10 1.419(6) . ? 
C9 C28 1.506(7) . ? 
C10 C11 1.374(7) . ? 
C10 C21 1.454(7) . ? 
C11 C29 1.521(7) . ? 
C12 C13 1.518(8) . ? 
C12 H4 0.9700 . ? 
C12 H5 0.9700 . ? 
C13 C14 1.519(8) . ? 
C13 H6 0.9700 . ? 
C13 H7 0.9700 . ? 
C14 C15 1.388(8) . ? 
C14 C19 1.449(7) . ? 
C15 C16 1.369(8) . ? 
C15 H8 0.9300 . ? 
C16 C17 1.389(7) . ? 
C16 H9 0.9300 . ? 
C17 C18 1.392(7) . ? 
C17 H10 0.9300 . ? 
C18 C19 1.382(7) . ? 
C18 H11 0.9300 . ? 
C20 H12 0.9600 . ? 
C20 H13 0.9600 . ? 
C20 H14 0.9600 . ? 
C21 C22 1.534(8) . ? 
C21 H15 0.9700 . ? 
C21 H16 0.9700 . ? 
C22 C23 1.476(7) . ? 
C22 H17 0.9700 . ? 
C22 H18 0.9700 . ? 
C23 C28 1.401(7) . ? 
C23 C24 1.435(8) . ? 
C24 C25 1.394(8) . ? 
C24 H19 0.9300 . ? 
C25 C26 1.386(7) . ? 
C25 H20 0.9300 . ? 
C26 C27 1.360(7) . ? 
C26 H21 0.9300 . ? 
C27 C28 1.401(7) . ? 
C27 H22 0.9300 . ? 
C29 H23 0.9600 . ? 
C29 H24 0.9600 . ? 
C29 H25 0.9600 . ? 
C30 C31 1.366(6) . ? 
C30 C35 1.392(6) . ? 
C31 C32 1.412(7) . ? 
C31 H26 0.9300 . ? 
C32 C33 1.379(7) . ? 
C32 H27 0.9300 . ? 
C33 C34 1.385(7) . ? 
C33 H28 0.9300 . ? 
C34 C35 1.397(6) . ? 
C34 H29 0.9300 . ? 
N3 C40 1.506(6) . ? 
N3 C48 1.520(6) . ? 
N3 C44 1.526(5) . ? 
N3 C36 1.546(5) . ? 
C36 C37 1.557(6) . ? 
C36 H30 0.9700 . ? 
C36 H31 0.9700 . ? 
C37 C38 1.537(6) . ? 
C37 H32 0.9700 . ? 
C37 H33 0.9700 . ? 
C38 C39 1.546(7) . ? 
C38 H34 0.9700 . ? 
C38 H35 0.9700 . ? 
C39 H36 0.9600 . ? 
C39 H37 0.9600 . ? 
C39 H38 0.9600 . ? 
C40 C41 1.556(7) . ? 
C40 H39 0.9700 . ? 
C40 H40 0.9700 . ? 
C41 C42 1.528(7) . ? 
C41 H41 0.9700 . ? 
C41 H42 0.9700 . ? 
C42 C43 1.436(8) . ? 
C42 H43 0.9700 . ? 
C42 H44 0.9700 . ? 
C43 H45 0.9600 . ? 
C43 H46 0.9600 . ? 
C43 H47 0.9600 . ? 
C44 C45 1.493(6) . ? 
C44 H48 0.9700 . ? 
C44 H49 0.9700 . ? 
C45 C46 1.533(7) . ? 
C45 H50 0.9700 . ? 
C45 H51 0.9700 . ? 
C46 C47 1.450(8) . ? 
C46 H52 0.9700 . ? 
C46 H53 0.9700 . ? 
C47 H54 0.9600 . ? 
C47 H55 0.9600 . ? 
C47 H56 0.9600 . ? 
C48 C49 1.512(7) . ? 
C48 H57 0.9700 . ? 
C48 H58 0.9700 . ? 
C49 C50 1.558(6) . ? 
C49 H59 0.9700 . ? 
C49 H60 0.9700 . ? 
C50 C51 1.523(7) . ? 
C50 H61 0.9700 . ? 
C50 H62 0.9700 . ? 
C51 H63 0.9600 . ? 
C51 H64 0.9600 . ? 
C51 H65 0.9600 . ? 
 
loop_ 
 _geom_angle_atom_site_label_1 
 _geom_angle_atom_site_label_2 
 _geom_angle_atom_site_label_3 
 _geom_angle 
 _geom_angle_site_symmetry_1 
 _geom_angle_site_symmetry_3 
 _geom_angle_publ_flag 
C5 O1 B1 123.4(3) . . ? 
C7 O2 B1 122.0(3) . . ? 
O4 B1 O3 106.9(3) . . ? 
O4 B1 O2 110.1(4) . . ? 
O3 B1 O2 110.4(3) . . ? 
O4 B1 O1 109.0(3) . . ? 
O3 B1 O1 109.4(4) . . ? 
O2 B1 O1 110.9(3) . . ? 
C30 O3 B1 106.4(3) . . ? 
C35 O4 B1 105.5(3) . . ? 
C1 N1 C4 110.2(4) . . ? 
C1 N1 H1 124.9 . . ? 
C4 N1 H1 124.9 . . ? 
C11 N2 C8 109.5(4) . . ? 
C11 N2 H2 125.3 . . ? 
C8 N2 H2 125.3 . . ? 
N1 C1 C2 107.3(5) . . ? 
N1 C1 C20 120.8(5) . . ? 
C2 C1 C20 131.8(5) . . ? 
C1 C2 C3 108.6(5) . . ? 
C1 C2 C12 129.1(5) . . ? 
C3 C2 C12 122.3(5) . . ? 
C4 C3 C2 106.7(5) . . ? 
C4 C3 C19 135.2(5) . . ? 
C2 C3 C19 118.0(4) . . ? 
N1 C4 C3 107.1(4) . . ? 
N1 C4 C5 117.1(4) . . ? 
C3 C4 C5 135.8(5) . . ? 
O1 C5 C6 120.1(4) . . ? 
O1 C5 C4 118.8(4) . . ? 
C6 C5 C4 121.1(4) . . ? 
C7 C6 C5 120.5(4) . . ? 
C7 C6 H3 119.7 . . ? 
C5 C6 H3 119.7 . . ? 
O2 C7 C6 121.1(4) . . ? 
O2 C7 C8 115.2(4) . . ? 
C6 C7 C8 123.6(4) . . ? 
N2 C8 C9 106.6(4) . . ? 
N2 C8 C7 118.1(4) . . ? 
C9 C8 C7 135.2(4) . . ? 
C8 C9 C10 107.3(4) . . ? 
C8 C9 C28 133.1(4) . . ? 
C10 C9 C28 119.3(4) . . ? 
C11 C10 C9 106.9(4) . . ? 
C11 C10 C21 131.1(5) . . ? 
C9 C10 C21 122.0(5) . . ? 
N2 C11 C10 109.7(4) . . ? 
N2 C11 C29 119.9(5) . . ? 
C10 C11 C29 130.4(5) . . ? 
C13 C12 C2 107.4(4) . . ? 
C13 C12 H4 110.2 . . ? 
C2 C12 H4 110.2 . . ? 
C13 C12 H5 110.2 . . ? 
C2 C12 H5 110.2 . . ? 
H4 C12 H5 108.5 . . ? 
C12 C13 C14 112.8(4) . . ? 
C12 C13 H6 109.0 . . ? 
C14 C13 H6 109.0 . . ? 
C12 C13 H7 109.0 . . ? 
C14 C13 H7 109.0 . . ? 
H6 C13 H7 107.8 . . ? 
C15 C14 C19 118.3(5) . . ? 
C15 C14 C13 123.0(5) . . ? 
C19 C14 C13 118.6(5) . . ? 
C16 C15 C14 123.2(5) . . ? 
C16 C15 H8 118.4 . . ? 
C14 C15 H8 118.4 . . ? 
C15 C16 C17 118.0(6) . . ? 
C15 C16 H9 121.0 . . ? 
C17 C16 H9 121.0 . . ? 
C16 C17 C18 121.3(6) . . ? 
C16 C17 H10 119.4 . . ? 
C18 C17 H10 119.4 . . ? 
C19 C18 C17 121.2(5) . . ? 
C19 C18 H11 119.4 . . ? 
C17 C18 H11 119.4 . . ? 
C18 C19 C14 118.0(5) . . ? 
C18 C19 C3 124.5(4) . . ? 
C14 C19 C3 117.5(5) . . ? 
C1 C20 H12 109.5 . . ? 
C1 C20 H13 109.5 . . ? 
H12 C20 H13 109.5 . . ? 
C1 C20 H14 109.5 . . ? 
H12 C20 H14 109.5 . . ? 
H13 C20 H14 109.5 . . ? 
C10 C21 C22 110.3(4) . . ? 
C10 C21 H15 109.6 . . ? 
C22 C21 H15 109.6 . . ? 
C10 C21 H16 109.6 . . ? 
C22 C21 H16 109.6 . . ? 
H15 C21 H16 108.1 . . ? 
C23 C22 C21 110.5(5) . . ? 
C23 C22 H17 109.6 . . ? 
C21 C22 H17 109.6 . . ? 
C23 C22 H18 109.5 . . ? 
C21 C22 H18 109.6 . . ? 
H17 C22 H18 108.1 . . ? 
C28 C23 C24 116.3(5) . . ? 
C28 C23 C22 122.8(5) . . ? 
C24 C23 C22 120.5(5) . . ? 
C25 C24 C23 119.9(5) . . ? 
C25 C24 H19 120.0 . . ? 
C23 C24 H19 120.0 . . ? 
C26 C25 C24 121.3(5) . . ? 
C26 C25 H20 119.4 . . ? 
C24 C25 H20 119.4 . . ? 
C27 C26 C25 119.9(5) . . ? 
C27 C26 H21 120.0 . . ? 
C25 C26 H21 120.0 . . ? 
C26 C27 C28 120.0(5) . . ? 
C26 C27 H22 120.0 . . ? 
C28 C27 H22 120.0 . . ? 
C23 C28 C27 122.3(5) . . ? 
C23 C28 C9 114.2(5) . . ? 
C27 C28 C9 123.4(4) . . ? 
C11 C29 H23 109.5 . . ? 
C11 C29 H24 109.5 . . ? 
H23 C29 H24 109.5 . . ? 
C11 C29 H25 109.5 . . ? 
H23 C29 H25 109.5 . . ? 
H24 C29 H25 109.5 . . ? 
C31 C30 O3 128.5(4) . . ? 
C31 C30 C35 122.1(4) . . ? 
O3 C30 C35 109.4(4) . . ? 
C30 C31 C32 116.2(4) . . ? 
C30 C31 H26 121.9 . . ? 
C32 C31 H26 121.9 . . ? 
C33 C32 C31 122.2(4) . . ? 
C33 C32 H27 118.9 . . ? 
C31 C32 H27 118.9 . . ? 
C32 C33 C34 121.2(5) . . ? 
C32 C33 H28 119.4 . . ? 
C34 C33 H28 119.4 . . ? 
C33 C34 C35 116.8(5) . . ? 
C33 C34 H29 121.6 . . ? 
C35 C34 H29 121.6 . . ? 
O4 C35 C30 111.6(4) . . ? 
O4 C35 C34 126.9(4) . . ? 
C30 C35 C34 121.5(4) . . ? 
C40 N3 C48 107.8(3) . . ? 
C40 N3 C44 110.8(4) . . ? 
C48 N3 C44 111.2(3) . . ? 
C40 N3 C36 109.9(3) . . ? 
C48 N3 C36 111.7(3) . . ? 
C44 N3 C36 105.5(3) . . ? 
N3 C36 C37 114.1(4) . . ? 
N3 C36 H30 108.7 . . ? 
C37 C36 H30 108.7 . . ? 
N3 C36 H31 108.7 . . ? 
C37 C36 H31 108.7 . . ? 
H30 C36 H31 107.6 . . ? 
C38 C37 C36 107.7(4) . . ? 
C38 C37 H32 110.2 . . ? 
C36 C37 H32 110.2 . . ? 
C38 C37 H33 110.2 . . ? 
C36 C37 H33 110.2 . . ? 
H32 C37 H33 108.5 . . ? 
C37 C38 C39 110.9(4) . . ? 
C37 C38 H34 109.5 . . ? 
C39 C38 H34 109.4 . . ? 
C37 C38 H35 109.5 . . ? 
C39 C38 H35 109.5 . . ? 
H34 C38 H35 108.0 . . ? 
C38 C39 H36 109.5 . . ? 
C38 C39 H37 109.5 . . ? 
H36 C39 H37 109.5 . . ? 
C38 C39 H38 109.5 . . ? 
H36 C39 H38 109.5 . . ? 
H37 C39 H38 109.5 . . ? 
N3 C40 C41 115.7(4) . . ? 
N3 C40 H39 108.3 . . ? 
C41 C40 H39 108.3 . . ? 
N3 C40 H40 108.3 . . ? 
C41 C40 H40 108.3 . . ? 
H39 C40 H40 107.4 . . ? 
C42 C41 C40 109.2(4) . . ? 
C42 C41 H41 109.8 . . ? 
C40 C41 H41 109.8 . . ? 
C42 C41 H42 109.8 . . ? 
C40 C41 H42 109.8 . . ? 
H41 C41 H42 108.3 . . ? 
C43 C42 C41 113.8(5) . . ? 
C43 C42 H43 108.8 . . ? 
C41 C42 H43 108.8 . . ? 
C43 C42 H44 108.8 . . ? 
C41 C42 H44 108.8 . . ? 
H43 C42 H44 107.7 . . ? 
C42 C43 H45 109.5 . . ? 
C42 C43 H46 109.5 . . ? 
H45 C43 H46 109.5 . . ? 
C42 C43 H47 109.5 . . ? 
H45 C43 H47 109.5 . . ? 
H46 C43 H47 109.5 . . ? 
C45 C44 N3 116.0(4) . . ? 
C45 C44 H48 108.3 . . ? 
N3 C44 H48 108.3 . . ? 
C45 C44 H49 108.3 . . ? 
N3 C44 H49 108.3 . . ? 
H48 C44 H49 107.4 . . ? 
C44 C45 C46 108.4(4) . . ? 
C44 C45 H50 110.0 . . ? 
C46 C45 H50 110.0 . . ? 
C44 C45 H51 110.0 . . ? 
C46 C45 H51 110.0 . . ? 
H50 C45 H51 108.4 . . ? 
C47 C46 C45 121.0(5) . . ? 
C47 C46 H52 107.1 . . ? 
C45 C46 H52 107.1 . . ? 
C47 C46 H53 107.1 . . ? 
C45 C46 H53 107.1 . . ? 
H52 C46 H53 106.8 . . ? 
C46 C47 H54 109.5 . . ? 
C46 C47 H55 109.5 . . ? 
H54 C47 H55 109.5 . . ? 
C46 C47 H56 109.5 . . ? 
H54 C47 H56 109.5 . . ? 
H55 C47 H56 109.5 . . ? 
C49 C48 N3 115.1(4) . . ? 
C49 C48 H57 108.5 . . ? 
N3 C48 H57 108.5 . . ? 
C49 C48 H58 108.5 . . ? 
N3 C48 H58 108.5 . . ? 
H57 C48 H58 107.5 . . ? 
C48 C49 C50 109.6(4) . . ? 
C48 C49 H59 109.8 . . ? 
C50 C49 H59 109.8 . . ? 
C48 C49 H60 109.8 . . ? 
C50 C49 H60 109.8 . . ? 
H59 C49 H60 108.2 . . ? 
C51 C50 C49 110.6(4) . . ? 
C51 C50 H61 109.5 . . ? 
C49 C50 H61 109.5 . . ? 
C51 C50 H62 109.5 . . ? 
C49 C50 H62 109.5 . . ? 
H61 C50 H62 108.1 . . ? 
C50 C51 H63 109.5 . . ? 
C50 C51 H64 109.5 . . ? 
H63 C51 H64 109.5 . . ? 
C50 C51 H65 109.5 . . ? 
H63 C51 H65 109.5 . . ? 
H64 C51 H65 109.5 . . ? 
 
loop_ 
 _geom_torsion_atom_site_label_1 
 _geom_torsion_atom_site_label_2 
 _geom_torsion_atom_site_label_3 
 _geom_torsion_atom_site_label_4 
 _geom_torsion 
 _geom_torsion_site_symmetry_1 
 _geom_torsion_site_symmetry_2 
 _geom_torsion_site_symmetry_3 
 _geom_torsion_site_symmetry_4 
 _geom_torsion_publ_flag 
C7 O2 B1 O4 -135.6(4) . . . . ? 
C7 O2 B1 O3 106.6(4) . . . . ? 
C7 O2 B1 O1 -14.8(6) . . . . ? 
C5 O1 B1 O4 131.1(4) . . . . ? 
C5 O1 B1 O3 -112.4(4) . . . . ? 
C5 O1 B1 O2 9.6(6) . . . . ? 
O4 B1 O3 C30 -3.9(4) . . . . ? 
O2 B1 O3 C30 115.9(4) . . . . ? 
O1 B1 O3 C30 -121.8(3) . . . . ? 
O3 B1 O4 C35 4.5(4) . . . . ? 
O2 B1 O4 C35 -115.5(4) . . . . ? 
O1 B1 O4 C35 122.6(4) . . . . ? 
C4 N1 C1 C2 1.1(6) . . . . ? 
C4 N1 C1 C20 178.6(5) . . . . ? 
N1 C1 C2 C3 -0.2(6) . . . . ? 
C20 C1 C2 C3 -177.3(6) . . . . ? 
N1 C1 C2 C12 -177.9(5) . . . . ? 
C20 C1 C2 C12 5.0(10) . . . . ? 
C1 C2 C3 C4 -0.8(6) . . . . ? 
C12 C2 C3 C4 177.1(5) . . . . ? 
C1 C2 C3 C19 178.1(5) . . . . ? 
C12 C2 C3 C19 -4.0(7) . . . . ? 
C1 N1 C4 C3 -1.5(5) . . . . ? 
C1 N1 C4 C5 179.5(4) . . . . ? 
C2 C3 C4 N1 1.4(5) . . . . ? 
C19 C3 C4 N1 -177.2(5) . . . . ? 
C2 C3 C4 C5 -179.9(5) . . . . ? 
C19 C3 C4 C5 1.5(10) . . . . ? 
B1 O1 C5 C6 1.9(6) . . . . ? 
B1 O1 C5 C4 179.9(4) . . . . ? 
N1 C4 C5 O1 172.2(4) . . . . ? 
C3 C4 C5 O1 -6.4(8) . . . . ? 
N1 C4 C5 C6 -9.9(7) . . . . ? 
C3 C4 C5 C6 171.5(5) . . . . ? 
O1 C5 C6 C7 -9.8(7) . . . . ? 
C4 C5 C6 C7 172.2(4) . . . . ? 
B1 O2 C7 C6 8.6(6) . . . . ? 
B1 O2 C7 C8 -174.6(4) . . . . ? 
C5 C6 C7 O2 4.6(7) . . . . ? 
C5 C6 C7 C8 -172.0(4) . . . . ? 
C11 N2 C8 C9 0.7(5) . . . . ? 
C11 N2 C8 C7 177.2(4) . . . . ? 
O2 C7 C8 N2 -160.4(4) . . . . ? 
C6 C7 C8 N2 16.3(7) . . . . ? 
O2 C7 C8 C9 14.8(8) . . . . ? 
C6 C7 C8 C9 -168.4(5) . . . . ? 
N2 C8 C9 C10 -1.2(5) . . . . ? 
C7 C8 C9 C10 -176.8(5) . . . . ? 
N2 C8 C9 C28 -173.5(5) . . . . ? 
C7 C8 C9 C28 10.8(9) . . . . ? 
C8 C9 C10 C11 1.3(5) . . . . ? 
C28 C9 C10 C11 174.8(4) . . . . ? 
C8 C9 C10 C21 179.5(5) . . . . ? 
C28 C9 C10 C21 -6.9(7) . . . . ? 
C8 N2 C11 C10 0.1(5) . . . . ? 
C8 N2 C11 C29 179.2(4) . . . . ? 
C9 C10 C11 N2 -0.9(6) . . . . ? 
C21 C10 C11 N2 -178.9(5) . . . . ? 
C9 C10 C11 C29 -179.8(5) . . . . ? 
C21 C10 C11 C29 2.1(10) . . . . ? 
C1 C2 C12 C13 143.6(6) . . . . ? 
C3 C2 C12 C13 -33.8(7) . . . . ? 
C2 C12 C13 C14 53.2(6) . . . . ? 
C12 C13 C14 C15 136.5(5) . . . . ? 
C12 C13 C14 C19 -38.8(6) . . . . ? 
C19 C14 C15 C16 -4.6(8) . . . . ? 
C13 C14 C15 C16 -180.0(5) . . . . ? 
C14 C15 C16 C17 4.5(8) . . . . ? 
C15 C16 C17 C18 -1.3(8) . . . . ? 
C16 C17 C18 C19 -1.5(8) . . . . ? 
C17 C18 C19 C14 1.4(7) . . . . ? 
C17 C18 C19 C3 179.4(5) . . . . ? 
C15 C14 C19 C18 1.6(7) . . . . ? 
C13 C14 C19 C18 177.1(4) . . . . ? 
C15 C14 C19 C3 -176.6(4) . . . . ? 
C13 C14 C19 C3 -1.1(6) . . . . ? 
C4 C3 C19 C18 23.3(9) . . . . ? 
C2 C3 C19 C18 -155.2(5) . . . . ? 
C4 C3 C19 C14 -158.7(5) . . . . ? 
C2 C3 C19 C14 22.8(7) . . . . ? 
C11 C10 C21 C22 149.3(6) . . . . ? 
C9 C10 C21 C22 -28.6(7) . . . . ? 
C10 C21 C22 C23 50.0(6) . . . . ? 
C21 C22 C23 C28 -41.2(7) . . . . ? 
C21 C22 C23 C24 146.2(5) . . . . ? 
C28 C23 C24 C25 5.4(8) . . . . ? 
C22 C23 C24 C25 178.5(5) . . . . ? 
C23 C24 C25 C26 -3.3(9) . . . . ? 
C24 C25 C26 C27 0.8(8) . . . . ? 
C25 C26 C27 C28 -0.7(8) . . . . ? 
C24 C23 C28 C27 -5.4(8) . . . . ? 
C22 C23 C28 C27 -178.4(5) . . . . ? 
C24 C23 C28 C9 179.0(5) . . . . ? 
C22 C23 C28 C9 6.0(7) . . . . ? 
C26 C27 C28 C23 3.2(8) . . . . ? 
C26 C27 C28 C9 178.4(5) . . . . ? 
C8 C9 C28 C23 -168.8(5) . . . . ? 
C10 C9 C28 C23 19.6(7) . . . . ? 
C8 C9 C28 C27 15.6(8) . . . . ? 
C10 C9 C28 C27 -156.0(5) . . . . ? 
B1 O3 C30 C31 -178.0(4) . . . . ? 
B1 O3 C30 C35 1.9(4) . . . . ? 
O3 C30 C31 C32 -177.8(4) . . . . ? 
C35 C30 C31 C32 2.3(6) . . . . ? 
C30 C31 C32 C33 -3.2(7) . . . . ? 
C31 C32 C33 C34 1.9(7) . . . . ? 
C32 C33 C34 C35 0.3(7) . . . . ? 
B1 O4 C35 C30 -3.4(4) . . . . ? 
B1 O4 C35 C34 177.7(4) . . . . ? 
C31 C30 C35 O4 -179.1(4) . . . . ? 
O3 C30 C35 O4 1.0(5) . . . . ? 
C31 C30 C35 C34 -0.1(7) . . . . ? 
O3 C30 C35 C34 179.9(4) . . . . ? 
C33 C34 C35 O4 177.6(4) . . . . ? 
C33 C34 C35 C30 -1.2(6) . . . . ? 
C40 N3 C36 C37 58.3(5) . . . . ? 
C48 N3 C36 C37 -61.3(5) . . . . ? 
C44 N3 C36 C37 177.8(4) . . . . ? 
N3 C36 C37 C38 154.6(4) . . . . ? 
C36 C37 C38 C39 174.2(4) . . . . ? 
C48 N3 C40 C41 -177.4(4) . . . . ? 
C44 N3 C40 C41 -55.5(5) . . . . ? 
C36 N3 C40 C41 60.7(5) . . . . ? 
N3 C40 C41 C42 171.3(4) . . . . ? 
C40 C41 C42 C43 -179.4(5) . . . . ? 
C40 N3 C44 C45 -58.8(5) . . . . ? 
C48 N3 C44 C45 61.1(5) . . . . ? 
C36 N3 C44 C45 -177.6(4) . . . . ? 
N3 C44 C45 C46 171.9(4) . . . . ? 
C44 C45 C46 C47 173.8(6) . . . . ? 
C40 N3 C48 C49 -168.5(4) . . . . ? 
C44 N3 C48 C49 69.9(5) . . . . ? 
C36 N3 C48 C49 -47.7(5) . . . . ? 
N3 C48 C49 C50 -174.3(4) . . . . ? 
C48 C49 C50 C51 -169.2(4) . . . . ? 
 
_diffrn_measured_fraction_theta_max    0.999 
_diffrn_reflns_theta_full              68.25 
_diffrn_measured_fraction_theta_full   0.999 
_refine_diff_density_max    0.737 
_refine_diff_density_min   -0.384 
_refine_diff_density_rms    0.069 

# SQUEEZE RESULTS (APPEND TO CIF)
loop_
  _platon_squeeze_void_nr
  _platon_squeeze_void_average_x
  _platon_squeeze_void_average_y
  _platon_squeeze_void_average_z
  _platon_squeeze_void_volume
  _platon_squeeze_void_count_electrons
         1     0.548    -0.112     0.619      60.9      14.5
         2     0.958     0.146     0.885       7.1       0.5
         3     0.452     0.388     0.381      60.9      14.4
         4     0.169     0.468     0.143      10.7       0.9
         5     0.040     0.648     0.114       6.7       0.5
         6     0.829     0.967     0.857      10.3       0.9
_platon_squeeze_details
;
;


#==============================================================================

#     End of CIF

#==============================================================================


data_00917 
 
_audit_creation_method            SHELXL-97 
_chemical_name_systematic 
; 
 ? 
; 
_chemical_name_common             ? 
_chemical_melting_point           ? 
_chemical_formula_moiety          ? 
_chemical_formula_sum 
 'C16 H13 N O2' 
_chemical_formula_weight          251.27 
 
loop_ 
 _atom_type_symbol 
 _atom_type_description 
 _atom_type_scat_dispersion_real 
 _atom_type_scat_dispersion_imag 
 _atom_type_scat_source 
 'C'  'C'   0.0033   0.0016 
 'International Tables Vol C Tables 4.2.6.8 and 6.1.1.4' 
 'H'  'H'   0.0000   0.0000 
 'International Tables Vol C Tables 4.2.6.8 and 6.1.1.4' 
 'N'  'N'   0.0061   0.0033 
 'International Tables Vol C Tables 4.2.6.8 and 6.1.1.4' 
 'O'  'O'   0.0106   0.0060 
 'International Tables Vol C Tables 4.2.6.8 and 6.1.1.4' 
 
 _symmetry_cell_setting            monoclinic 
_symmetry_space_group_name_H-M    P21/n 
_symmetry_space_group_name_Hall       '	-P 2yn'
_symmetry_Int_Tables_number            14
 
loop_ 
 _symmetry_equiv_pos_as_xyz 
 'x, y, z' 
 '-x+1/2, y+1/2, -z+1/2' 
 '-x, -y, -z' 
 'x-1/2, -y-1/2, z-1/2' 
 
_cell_length_a                    8.696(4) 
_cell_length_b                    16.687(9) 
_cell_length_c                    9.096(4) 
_cell_angle_alpha                 90.00 
_cell_angle_beta                  116.168(18) 
_cell_angle_gamma                 90.00 
_cell_volume                      1184.5(10) 
_cell_formula_units_Z             4 
_cell_measurement_temperature     123(2) 
_cell_measurement_reflns_used     ? 
_cell_measurement_theta_min       ? 
_cell_measurement_theta_max       ? 
 
_exptl_crystal_description        prism 
_exptl_crystal_colour             colorless  
_exptl_crystal_size_max           0.60 
_exptl_crystal_size_mid           0.40 
_exptl_crystal_size_min           0.20 
_exptl_crystal_density_meas       ? 
_exptl_crystal_density_diffrn     1.409 
_exptl_crystal_density_method     'not measured' 
_exptl_crystal_F_000              528 
_exptl_absorpt_coefficient_mu     0.093 
_exptl_absorpt_correction_type    none 
_exptl_absorpt_correction_T_min   0.9461 
_exptl_absorpt_correction_T_max   0.9816 
_exptl_absorpt_process_details    ? 
 
_exptl_special_details 
; 
 ? 
; 
 
_diffrn_ambient_temperature       123(2) 
_diffrn_radiation_wavelength      0.71075 
_diffrn_radiation_type            MoK�a 
_diffrn_radiation_source          'fine-focus sealed tube' 
_diffrn_radiation_monochromator   graphite 
_diffrn_measurement_device_type   'Rigaku RAXIS-RAPID' 
_diffrn_measurement_method        �w 
_diffrn_detector_area_resol_mean  10.00 
_diffrn_standards_number          ? 
_diffrn_standards_interval_count  ? 
_diffrn_standards_interval_time   ? 
_diffrn_standards_decay_%         ? 
_diffrn_reflns_number             11519 
_diffrn_reflns_av_R_equivalents   0.0261 
_diffrn_reflns_av_sigmaI/netI     0.0216 
_diffrn_reflns_limit_h_min        -11 
_diffrn_reflns_limit_h_max        11 
_diffrn_reflns_limit_k_min        -21 
_diffrn_reflns_limit_k_max        21 
_diffrn_reflns_limit_l_min        -11 
_diffrn_reflns_limit_l_max        11 
_diffrn_reflns_theta_min          3.49 
_diffrn_reflns_theta_max          27.46 
_reflns_number_total              2709 
_reflns_number_gt                 2263 
_reflns_threshold_expression      >2sigma(I) 
 
_computing_data_collection        ? 
_computing_cell_refinement        ? 
_computing_data_reduction         ? 
_computing_structure_solution     'SHELXS-97 (Sheldrick, 1990)' 
_computing_structure_refinement   'SHELXL-97 (Sheldrick, 1997)' 
_computing_molecular_graphics     ? 
_computing_publication_material   ? 
 
_refine_special_details 
; 
 Refinement of F^2^ against ALL reflections.  The weighted R-factor wR and 
 goodness of fit S are based on F^2^, conventional R-factors R are based 
 on F, with F set to zero for negative F^2^. The threshold expression of 
 F^2^ > 2sigma(F^2^) is used only for calculating R-factors(gt) etc. and is 
 not relevant to the choice of reflections for refinement.  R-factors based 
 on F^2^ are statistically about twice as large as those based on F, and R- 
 factors based on ALL data will be even larger. 
; 
 
_refine_ls_structure_factor_coef  Fsqd  
_refine_ls_matrix_type            full 
_refine_ls_weighting_scheme       calc  
_refine_ls_weighting_details 
 'calc w=1/[�s^2^(Fo^2^)+(0.0457P)^2^+0.2922P] where P=(Fo^2^+2Fc^2^)/3' 
_atom_sites_solution_primary      direct 
_atom_sites_solution_secondary    difmap 
_atom_sites_solution_hydrogens    geom 
_refine_ls_hydrogen_treatment     constr 
_refine_ls_extinction_method      none 
_refine_ls_extinction_coef        ? 
_refine_ls_number_reflns          2709 
_refine_ls_number_parameters      173 
_refine_ls_number_restraints      0 
_refine_ls_R_factor_all           0.0433 
_refine_ls_R_factor_gt            0.0350 
_refine_ls_wR_factor_ref          0.0917 
_refine_ls_wR_factor_gt           0.0871 
_refine_ls_goodness_of_fit_ref    1.055 
_refine_ls_restrained_S_all       1.055 
_refine_ls_shift/su_max           0.000 
_refine_ls_shift/su_mean          0.000 
 
loop_ 
 _atom_site_label 
 _atom_site_type_symbol 
 _atom_site_fract_x 
 _atom_site_fract_y 
 _atom_site_fract_z 
 _atom_site_U_iso_or_equiv 
 _atom_site_adp_type 
 _atom_site_occupancy 
 _atom_site_symmetry_multiplicity 
 _atom_site_calc_flag 
 _atom_site_refinement_flags 
 _atom_site_disorder_assembly 
 _atom_site_disorder_group 
O1 O 0.90740(11) 0.15875(5) 0.01198(10) 0.0269(2) Uani 1 1 d . . . 
N1 N 0.99624(11) 0.04722(5) 0.18011(11) 0.0184(2) Uani 1 1 d . . . 
O2 O 0.64884(10) -0.02276(5) 0.23972(11) 0.0296(2) Uani 1 1 d . . . 
C2 C 1.05785(13) -0.06237(6) 0.33743(13) 0.0182(2) Uani 1 1 d . . . 
C5 C 0.87831(14) 0.10595(6) 0.08627(13) 0.0212(2) Uani 1 1 d . . . 
C3 C 1.20530(13) -0.03724(6) 0.31815(13) 0.0193(2) Uani 1 1 d . . . 
C4 C 1.16595(13) 0.03035(6) 0.22201(13) 0.0194(2) Uani 1 1 d . . . 
C10 C 0.92900(13) -0.00843(6) 0.25089(13) 0.0189(2) Uani 1 1 d . . . 
C6 C 0.75214(14) 0.01212(7) 0.20485(14) 0.0219(2) Uani 1 1 d . . . 
C7 C 0.71441(14) 0.08727(7) 0.09972(15) 0.0249(3) Uani 1 1 d . . . 
H1 H 0.6190 0.0776 -0.0100 0.030 Uiso 1 1 calc R . . 
H2 H 0.6829 0.1323 0.1520 0.030 Uiso 1 1 calc R . . 
C11 C 0.95188(16) -0.21419(7) 0.58553(15) 0.0291(3) Uani 1 1 d . . . 
H3 H 0.8649 -0.2253 0.6190 0.035 Uiso 1 1 calc R . . 
C12 C 1.37011(14) -0.08290(7) 0.40116(15) 0.0253(3) Uani 1 1 d . . . 
H4 H 1.4379 -0.0615 0.5129 0.030 Uiso 1 1 calc R . . 
H5 H 1.4383 -0.0765 0.3389 0.030 Uiso 1 1 calc R . . 
C13 C 0.93799(15) -0.14774(7) 0.48911(14) 0.0236(2) Uani 1 1 d . . . 
H6 H 0.8430 -0.1126 0.4590 0.028 Uiso 1 1 calc R . . 
C14 C 1.06343(14) -0.13232(6) 0.43596(13) 0.0198(2) Uani 1 1 d . . . 
C15 C 1.21757(16) -0.24967(7) 0.58073(14) 0.0285(3) Uani 1 1 d . . . 
H7 H 1.3136 -0.2844 0.6142 0.034 Uiso 1 1 calc R . . 
C16 C 1.33142(16) -0.17156(7) 0.41052(15) 0.0277(3) Uani 1 1 d . . . 
H8 H 1.2852 -0.1951 0.2993 0.033 Uiso 1 1 calc R . . 
H9 H 1.4394 -0.1998 0.4800 0.033 Uiso 1 1 calc R . . 
C17 C 1.20430(15) -0.18465(7) 0.47983(14) 0.0231(2) Uani 1 1 d . . . 
C18 C 1.09260(17) -0.26444(7) 0.63319(15) 0.0316(3) Uani 1 1 d . . . 
H10 H 1.1036 -0.3091 0.7019 0.038 Uiso 1 1 calc R . . 
C9 C 1.27139(15) 0.08122(7) 0.16660(15) 0.0248(2) Uani 1 1 d . . . 
H11 H 1.2948 0.1328 0.2241 0.037 Uiso 1 1 calc R . . 
H12 H 1.2088 0.0904 0.0483 0.037 Uiso 1 1 calc R . . 
H13 H 1.3798 0.0540 0.1910 0.037 Uiso 1 1 calc R . . 
 
loop_ 
 _atom_site_aniso_label 
 _atom_site_aniso_U_11 
 _atom_site_aniso_U_22 
 _atom_site_aniso_U_33 
 _atom_site_aniso_U_23 
 _atom_site_aniso_U_13 
 _atom_site_aniso_U_12 
O1 0.0316(4) 0.0202(4) 0.0248(4) 0.0043(3) 0.0086(3) 0.0009(3) 
N1 0.0190(4) 0.0158(4) 0.0184(4) -0.0004(3) 0.0064(3) -0.0003(3) 
O2 0.0216(4) 0.0287(5) 0.0391(5) 0.0013(4) 0.0140(4) -0.0016(3) 
C2 0.0198(5) 0.0169(5) 0.0168(5) -0.0029(4) 0.0071(4) 0.0000(4) 
C5 0.0234(5) 0.0165(5) 0.0180(5) -0.0024(4) 0.0040(4) 0.0010(4) 
C3 0.0205(5) 0.0187(5) 0.0184(5) -0.0016(4) 0.0083(4) 0.0013(4) 
C4 0.0200(5) 0.0196(5) 0.0179(5) -0.0021(4) 0.0076(4) 0.0011(4) 
C10 0.0207(5) 0.0161(5) 0.0189(5) -0.0020(4) 0.0080(4) -0.0020(4) 
C6 0.0197(5) 0.0189(5) 0.0236(6) -0.0033(4) 0.0065(4) -0.0001(4) 
C7 0.0199(5) 0.0207(5) 0.0287(6) 0.0000(5) 0.0059(5) 0.0030(4) 
C11 0.0360(6) 0.0251(6) 0.0237(6) -0.0028(5) 0.0110(5) -0.0119(5) 
C12 0.0223(5) 0.0268(6) 0.0272(6) 0.0054(5) 0.0112(5) 0.0064(4) 
C13 0.0266(6) 0.0204(5) 0.0213(5) -0.0038(4) 0.0083(4) -0.0058(4) 
C14 0.0245(5) 0.0151(5) 0.0163(5) -0.0029(4) 0.0058(4) -0.0021(4) 
C15 0.0376(7) 0.0164(5) 0.0220(6) -0.0002(4) 0.0045(5) 0.0016(5) 
C16 0.0314(6) 0.0235(6) 0.0279(6) 0.0034(5) 0.0128(5) 0.0109(5) 
C17 0.0294(6) 0.0165(5) 0.0188(5) -0.0026(4) 0.0065(4) 0.0007(4) 
C18 0.0465(7) 0.0178(6) 0.0222(6) 0.0016(5) 0.0077(5) -0.0091(5) 
C9 0.0265(6) 0.0249(6) 0.0252(6) 0.0032(5) 0.0134(5) 0.0001(4) 
 
_geom_special_details 
; 
 All esds (except the esd in the dihedral angle between two l.s. planes) 
 are estimated using the full covariance matrix.  The cell esds are taken 
 into account individually in the estimation of esds in distances, angles 
 and torsion angles; correlations between esds in cell parameters are only 
 used when they are defined by crystal symmetry.  An approximate (isotropic) 
 treatment of cell esds is used for estimating esds involving l.s. planes. 
; 
 
loop_ 
 _geom_bond_atom_site_label_1 
 _geom_bond_atom_site_label_2 
 _geom_bond_distance 
 _geom_bond_site_symmetry_2 
 _geom_bond_publ_flag 
O1 C5 1.2031(15) . ? 
N1 C4 1.3806(15) . ? 
N1 C10 1.3967(14) . ? 
N1 C5 1.4031(14) . ? 
O2 C6 1.2237(15) . ? 
C2 C10 1.3810(15) . ? 
C2 C3 1.4313(15) . ? 
C2 C14 1.4593(16) . ? 
C5 C7 1.5157(17) . ? 
C3 C4 1.3748(16) . ? 
C3 C12 1.5000(15) . ? 
C4 C9 1.4908(16) . ? 
C10 C6 1.4458(16) . ? 
C6 C7 1.5225(17) . ? 
C7 H1 0.9900 . ? 
C7 H2 0.9900 . ? 
C11 C13 1.3855(17) . ? 
C11 C18 1.3859(19) . ? 
C11 H3 0.9500 . ? 
C12 C16 1.5278(18) . ? 
C12 H4 0.9900 . ? 
C12 H5 0.9900 . ? 
C13 C14 1.3982(17) . ? 
C13 H6 0.9500 . ? 
C14 C17 1.4110(16) . ? 
C15 C18 1.3881(19) . ? 
C15 C17 1.3926(17) . ? 
C15 H7 0.9500 . ? 
C16 C17 1.5105(18) . ? 
C16 H8 0.9900 . ? 
C16 H9 0.9900 . ? 
C18 H10 0.9500 . ? 
C9 H11 0.9800 . ? 
C9 H12 0.9800 . ? 
C9 H13 0.9800 . ? 
 
loop_ 
 _geom_angle_atom_site_label_1 
 _geom_angle_atom_site_label_2 
 _geom_angle_atom_site_label_3 
 _geom_angle 
 _geom_angle_site_symmetry_1 
 _geom_angle_site_symmetry_3 
 _geom_angle_publ_flag 
C4 N1 C10 110.55(9) . . ? 
C4 N1 C5 135.71(10) . . ? 
C10 N1 C5 113.74(9) . . ? 
C10 C2 C3 106.55(10) . . ? 
C10 C2 C14 132.08(10) . . ? 
C3 C2 C14 121.37(10) . . ? 
O1 C5 N1 125.09(11) . . ? 
O1 C5 C7 129.35(10) . . ? 
N1 C5 C7 105.56(10) . . ? 
C4 C3 C2 109.46(9) . . ? 
C4 C3 C12 130.65(10) . . ? 
C2 C3 C12 119.88(10) . . ? 
C3 C4 N1 106.18(9) . . ? 
C3 C4 C9 131.64(10) . . ? 
N1 C4 C9 122.17(10) . . ? 
C2 C10 N1 107.25(9) . . ? 
C2 C10 C6 144.27(10) . . ? 
N1 C10 C6 108.48(9) . . ? 
O2 C6 C10 128.38(11) . . ? 
O2 C6 C7 125.10(10) . . ? 
C10 C6 C7 106.52(9) . . ? 
C5 C7 C6 105.68(9) . . ? 
C5 C7 H1 110.6 . . ? 
C6 C7 H1 110.6 . . ? 
C5 C7 H2 110.6 . . ? 
C6 C7 H2 110.6 . . ? 
H1 C7 H2 108.7 . . ? 
C13 C11 C18 120.05(12) . . ? 
C13 C11 H3 120.0 . . ? 
C18 C11 H3 120.0 . . ? 
C3 C12 C16 109.56(10) . . ? 
C3 C12 H4 109.8 . . ? 
C16 C12 H4 109.8 . . ? 
C3 C12 H5 109.8 . . ? 
C16 C12 H5 109.8 . . ? 
H4 C12 H5 108.2 . . ? 
C11 C13 C14 120.17(11) . . ? 
C11 C13 H6 119.9 . . ? 
C14 C13 H6 119.9 . . ? 
C13 C14 C17 120.04(11) . . ? 
C13 C14 C2 122.67(10) . . ? 
C17 C14 C2 117.27(10) . . ? 
C18 C15 C17 121.00(12) . . ? 
C18 C15 H7 119.5 . . ? 
C17 C15 H7 119.5 . . ? 
C17 C16 C12 112.52(9) . . ? 
C17 C16 H8 109.1 . . ? 
C12 C16 H8 109.1 . . ? 
C17 C16 H9 109.1 . . ? 
C12 C16 H9 109.1 . . ? 
H8 C16 H9 107.8 . . ? 
C15 C17 C14 118.54(11) . . ? 
C15 C17 C16 121.63(11) . . ? 
C14 C17 C16 119.75(10) . . ? 
C11 C18 C15 120.14(11) . . ? 
C11 C18 H10 119.9 . . ? 
C15 C18 H10 119.9 . . ? 
C4 C9 H11 109.5 . . ? 
C4 C9 H12 109.5 . . ? 
H11 C9 H12 109.5 . . ? 
C4 C9 H13 109.5 . . ? 
H11 C9 H13 109.5 . . ? 
H12 C9 H13 109.5 . . ? 
 
loop_ 
 _geom_torsion_atom_site_label_1 
 _geom_torsion_atom_site_label_2 
 _geom_torsion_atom_site_label_3 
 _geom_torsion_atom_site_label_4 
 _geom_torsion 
 _geom_torsion_site_symmetry_1 
 _geom_torsion_site_symmetry_2 
 _geom_torsion_site_symmetry_3 
 _geom_torsion_site_symmetry_4 
 _geom_torsion_publ_flag 
C4 N1 C5 O1 2.0(2) . . . . ? 
C10 N1 C5 O1 -178.54(10) . . . . ? 
C4 N1 C5 C7 -178.41(11) . . . . ? 
C10 N1 C5 C7 1.09(12) . . . . ? 
C10 C2 C3 C4 -0.02(12) . . . . ? 
C14 C2 C3 C4 -179.16(9) . . . . ? 
C10 C2 C3 C12 178.74(10) . . . . ? 
C14 C2 C3 C12 -0.40(15) . . . . ? 
C2 C3 C4 N1 -0.50(12) . . . . ? 
C12 C3 C4 N1 -179.09(11) . . . . ? 
C2 C3 C4 C9 178.84(11) . . . . ? 
C12 C3 C4 C9 0.3(2) . . . . ? 
C10 N1 C4 C3 0.86(12) . . . . ? 
C5 N1 C4 C3 -179.62(11) . . . . ? 
C10 N1 C4 C9 -178.56(10) . . . . ? 
C5 N1 C4 C9 0.96(19) . . . . ? 
C3 C2 C10 N1 0.54(12) . . . . ? 
C14 C2 C10 N1 179.55(10) . . . . ? 
C3 C2 C10 C6 179.95(15) . . . . ? 
C14 C2 C10 C6 -1.0(2) . . . . ? 
C4 N1 C10 C2 -0.89(12) . . . . ? 
C5 N1 C10 C2 179.48(9) . . . . ? 
C4 N1 C10 C6 179.48(9) . . . . ? 
C5 N1 C10 C6 -0.16(12) . . . . ? 
C2 C10 C6 O2 -0.8(3) . . . . ? 
N1 C10 C6 O2 178.56(11) . . . . ? 
C2 C10 C6 C7 179.74(15) . . . . ? 
N1 C10 C6 C7 -0.85(12) . . . . ? 
O1 C5 C7 C6 178.08(11) . . . . ? 
N1 C5 C7 C6 -1.53(12) . . . . ? 
O2 C6 C7 C5 -177.98(11) . . . . ? 
C10 C6 C7 C5 1.46(12) . . . . ? 
C4 C3 C12 C16 -148.96(12) . . . . ? 
C2 C3 C12 C16 32.58(14) . . . . ? 
C18 C11 C13 C14 1.70(17) . . . . ? 
C11 C13 C14 C17 0.28(16) . . . . ? 
C11 C13 C14 C2 -178.55(10) . . . . ? 
C10 C2 C14 C13 -14.31(18) . . . . ? 
C3 C2 C14 C13 164.57(10) . . . . ? 
C10 C2 C14 C17 166.82(11) . . . . ? 
C3 C2 C14 C17 -14.29(15) . . . . ? 
C3 C12 C16 C17 -50.19(14) . . . . ? 
C18 C15 C17 C14 2.00(17) . . . . ? 
C18 C15 C17 C16 -174.95(11) . . . . ? 
C13 C14 C17 C15 -2.10(16) . . . . ? 
C2 C14 C17 C15 176.79(10) . . . . ? 
C13 C14 C17 C16 174.90(10) . . . . ? 
C2 C14 C17 C16 -6.20(15) . . . . ? 
C12 C16 C17 C15 -143.72(11) . . . . ? 
C12 C16 C17 C14 39.37(15) . . . . ? 
C13 C11 C18 C15 -1.82(18) . . . . ? 
C17 C15 C18 C11 -0.06(18) . . . . ? 
 
_diffrn_measured_fraction_theta_max    0.997 
_diffrn_reflns_theta_full              27.46 
_diffrn_measured_fraction_theta_full   0.997 
_refine_diff_density_max    0.269 
_refine_diff_density_min   -0.176 
_refine_diff_density_rms    0.038 


#==============================================================================

#     End of CIF

#==============================================================================
